# Supplementary material for: Heritability of Horn Size in Thinhorn Sheep
Source: Front Genet. 2019 Oct 11;10:959. doi: 10.3389/fgene.2019.00959 (PMC6797622; doi:10.3389/fgene.2019.00959)
Supplement: Supplementary file 4 [file Table_3.xlsx]

## Sheet: Sheet1
Table S3: GWAS results for horn volume showing effect of allele B, standard error and p-value
Locus	Effect of Allele B	Standard Error	P-value
oar3_OAR1_152000	314.164	333.168	0.345702
oar3_OAR1_394594	-70.0343	339.996	0.836802
oar3_OAR1_468667	-40.1365	129.151	0.755974
oar3_OAR1_935222	5.13665	84.321	0.951425
oar3_OAR1_1039681	-7.50767	164.26	0.963545
oar3_OAR1_1076136	-24.1451	113.812	0.831991
oar3_OAR1_1144404	189.226	87.4701	0.0305162
oar3_OAR1_1194465	184.963	158.267	0.242534
oar3_OAR1_1416981	46.2334	91.9497	0.615096
oar3_OAR1_1440610	87.5548	167.05	0.600192
oar3_OAR1_1633295	41.262	104.719	0.693562
oar3_OAR1_1649007	-19.7175	83.124	0.812497
oar3_OAR1_1806294	-46.8704	76.702	0.541152
oar3_OAR1_2582435	17.1269	84.1141	0.838655
oar3_OAR1_2907598	-262.312	133.556	0.0495229
oar3_OAR1_3107202	-19.0938	78.5934	0.808049
oar3_OAR1_3236980	-99.734	195.393	0.609752
oar3_OAR1_3832262	-45.4408	124.217	0.714501
oar3_OAR1_3836920	-45.4408	124.217	0.714501
oar3_OAR1_3921521	-64.1212	159.852	0.688326
oar3_OAR1_4964098	-20.2711	113.619	0.858399
OAR1_4285092.1	15.8286	79.1723	0.841538
oar3_OAR1_5068306	134.72	86.2751	0.118402
oar3_OAR1_5385036	46.7314	127.569	0.714125
oar3_OAR1_5682984	-49.6259	101.237	0.623997
oar3_OAR1_5913658	-73.1565	100.807	0.468017
oar3_OAR1_6276090	-26.6045	124.361	0.830602
oar3_OAR1_6283479	-32.8246	123.374	0.790195
oar3_OAR1_6291251	-79.3552	83.6647	0.34288
oar3_OAR1_6411717	-119.125	86.2583	0.167269
oar3_OAR1_6763144	15.7709	82.346	0.848118
oar3_OAR1_6795639	51.7923	96.2955	0.590683
oar3_OAR1_6876357	-31.8347	149.659	0.831549
oar3_OAR1_7703544	10.4641	78.7002	0.894224
oar3_OAR1_8442504	175.462	125.129	0.16084
oar3_OAR1_8453333	12.9515	79.4561	0.870517
oar3_OAR1_8502316	-22.4909	74.4777	0.762666
oar3_OAR1_8548259	12.337	118.395	0.917009
oar3_OAR1_8795475	86.6128	268.772	0.74726
oar3_OAR1_9653600	21.1101	268.239	0.937272
oar3_OAR1_10887696	35.0513	111.869	0.754034
oar3_OAR1_11142197	-886.171	265.705	0.000852493
oar3_OAR1_12009801	55.7177	102.24	0.585775
oar3_OAR1_12381310	38.7622	87.5891	0.658094
oar3_OAR1_12478803	-29.6052	89.1372	0.739791
oar3_OAR1_12810353	-8.97258	109.845	0.934898
oar3_OAR1_13736903	102.059	114.612	0.37321
oar3_OAR1_13749448	113.852	131.771	0.387582
oar3_OAR1_15199238	2.66218	131.498	0.983848
oar3_OAR1_15593219	54.598	110.04	0.619779
oar3_OAR1_15883352	103.406	79.2043	0.191703
oar3_OAR1_16572161	0.742709	93.6578	0.993673
oar3_OAR1_17135026	224.726	137.404	0.101942
oar3_OAR1_17291962	-85.6505	180.058	0.634301
oar3_OAR1_17682607	47.5613	133.757	0.722155
oar3_OAR1_17873476	-519.941	371.311	0.161429
oar3_OAR1_17884634	5.58342	97.6717	0.954414
oar3_OAR1_18620716	277.084	NA	NA
oar3_OAR1_18839869	56.2621	103.597	0.587071
oar3_OAR1_19908381	43.1514	77.6901	0.5786
oar3_OAR1_20905961	102.225	81.913	0.212042
oar3_OAR1_21152015	68.2226	250.325	0.78521
oar3_OAR1_21575435	-67.2269	112.294	0.549395
oar3_OAR1_22861371	199.949	192.463	0.298854
oar3_OAR1_22889133	-88.2513	346.968	0.799225
oar3_OAR1_23332001	137.553	255.184	0.589863
oar3_OAR1_23913942	-166.98	121.801	0.1704
oar3_OAR1_24023927	-33.1041	116.116	0.775571
oar3_OAR1_24295577	7.1298	145.398	0.96089
oar3_OAR1_24544110	127.185	84.3509	0.131604
oar3_OAR1_24691873	-155.357	183.218	0.396474
oar3_OAR1_28055097	120.449	85.2789	0.15783
oar3_OAR1_28921842	-27.3465	102.337	0.7893
oar3_OAR1_29393514	101.747	113.118	0.368397
oar3_OAR1_29995805	-73.9133	90.7372	0.415309
oar3_OAR1_31135447	-71.3437	82.2335	0.385627
oar3_OAR1_31141641	-71.3437	82.2335	0.385627
oar3_OAR1_31318706	64.2376	80.5695	0.425281
oar3_OAR1_31332553	64.2376	80.5695	0.425281
oar3_OAR1_31339761	62.4796	86.4886	0.470047
oar3_OAR1_32195849	302.583	246.785	0.22016
oar3_OAR1_32454524	229.555	98.9579	0.0203557
oar3_OAR1_32524690	204.754	108.347	0.0587846
oar3_OAR1_32594238	-96.1066	272.326	0.724156
oar3_OAR1_32594292	-96.1066	272.326	0.724156
oar3_OAR1_32594346	-119.158	151.284	0.430906
oar3_OAR1_32658650	-107.996	210.97	0.60872
oar3_OAR1_33885512	113.899	221.321	0.606811
oar3_OAR1_34067553	65.4345	248.698	0.792467
oar3_OAR1_34132108	357.047	184.104	0.0524551
oar3_OAR1_34318515	-187.538	139.525	0.17891
oar3_OAR1_35683721	554.512	250.749	0.0270067
oar3_OAR1_36135967	-96.89	78.0036	0.214192
oar3_OAR1_37603418	27.1053	130.059	0.834911
oar3_OAR1_37781255	-16.4835	84.2328	0.844853
oar3_OAR1_37871664	33.5087	176.179	0.849155
oar3_OAR1_38031321	-177.327	207.068	0.391792
oar3_OAR1_38236426	23.7786	82.0742	0.772029
oar3_OAR1_39026104	81.8619	330.39	0.80431
oar3_OAR1_39760614	277.084	NA	NA
oar3_OAR1_39927657	56.3486	105.331	0.592675
oar3_OAR1_40433037	98.9609	81.9862	0.227416
oar3_OAR1_40646909	71.7297	302.721	0.812695
oar3_OAR1_40688242	-97.7556	85.4093	0.252394
oar3_OAR1_40819378	-71.2497	101.931	0.484552
oar3_OAR1_41266771	-71.4342	348.926	0.837787
oar3_OAR1_41730122	-103.351	146.131	0.479415
oar3_OAR1_41855440	1218.75	369.862	0.000983727
oar3_OAR1_42525245	135.237	310.437	0.663102
oar3_OAR1_43262723	11.7167	84.0218	0.889096
oar3_OAR1_43291146	63.0219	86.2679	0.465062
oar3_OAR1_44321627	97.735	80.5056	0.224742
oar3_OAR1_45107146	146.605	223.755	0.512338
oar3_OAR1_45529649	-128.212	79.13	0.105173
oar3_OAR1_45605912	113.297	81.8232	0.166158
OAR1_48373831.1	52.7458	184.886	0.775424
oar3_OAR1_48183207	94.0211	179.2	0.599811
oar3_OAR1_49138872	49.0227	86.9292	0.572796
oar3_OAR1_49695102	-727.777	350.938	0.0380977
oar3_OAR1_49926554	112.064	81.7098	0.170222
oar3_OAR1_50105284	139.539	91.5531	0.127477
oar3_OAR1_51432748	-275.167	339.89	0.418183
oar3_OAR1_51600914	-129.582	79.5805	0.103459
oar3_OAR1_51609662	-129.582	79.5805	0.103459
oar3_OAR1_51628860	-141.691	78.8588	0.0723719
oar3_OAR1_51645986	-141.691	78.8588	0.0723719
oar3_OAR1_52105629	-601.095	265.214	0.023424
oar3_OAR1_52601623	142.095	282.97	0.615559
oar3_OAR1_53157952	5.75364	122.486	0.962534
oar3_OAR1_53456321	10.8009	82.0592	0.895283
oar3_OAR1_53557544	93.4698	104.763	0.372284
oar3_OAR1_53741841	-93.623	125.628	0.456125
oar3_OAR1_53904745	-30.2448	87.9022	0.730791
oar3_OAR1_54489499	-33.5534	117.189	0.774633
oar3_OAR1_55968047	-29.4032	79.231	0.710557
oar3_OAR1_57307548	7.66261	83.9867	0.927305
oar3_OAR1_59513396	154.819	164.619	0.346979
OAR1_63572898.1	196.005	237.29	0.408796
oar3_OAR1_60314253	119.613	147.948	0.418814
oar3_OAR1_61093613	-34.7326	76.3201	0.649044
oar3_OAR1_61298169	-89.6848	77.0046	0.244153
oar3_OAR1_61488600	47.4494	77.6823	0.541323
oar3_OAR1_61768477	-106.588	81.0419	0.188435
oar3_OAR1_61958755	-99.2995	78.1466	0.203842
oar3_OAR1_62014326	-44.5365	89.2782	0.617885
oar3_OAR1_62095201	-30.9059	110.586	0.779881
oar3_OAR1_62108826	-30.9059	110.586	0.779881
oar3_OAR1_62221465	-8.50564	90.6293	0.925228
oar3_OAR1_62229264	-44.437	84.2539	0.597903
oar3_OAR1_62241745	-44.437	84.2539	0.597903
oar3_OAR1_63033854	-18.2417	79.638	0.818824
oar3_OAR1_64596675	99.6502	90.9192	0.273066
oar3_OAR1_64675987	33.9767	187.407	0.856133
oar3_OAR1_65559780	228.185	328.794	0.487678
oar3_OAR1_65965887	244.819	182.899	0.180718
oar3_OAR1_65966031	244.819	182.899	0.180718
oar3_OAR1_65966456	254.206	262.817	0.333426
oar3_OAR1_65966534	244.819	182.899	0.180718
oar3_OAR1_65966953	244.819	182.899	0.180718
oar3_OAR1_66087264	92.9262	75.3568	0.21752
oar3_OAR1_66407499	33.4798	214.815	0.876148
oar3_OAR1_66829944	-64.4012	102.83	0.531127
oar3_OAR1_67098035	-309.5	266.283	0.245116
oar3_OAR1_67555767	163.676	84.6407	0.0531412
oar3_OAR1_67805807	100.004	127.266	0.43199
oar3_OAR1_68005671	382.914	154.456	0.0131708
oar3_OAR1_68235119	156.904	91.2779	0.0856202
oar3_OAR1_68663779	84.6596	149.142	0.570277
oar3_OAR1_68776536	-120.452	113.499	0.288573
oar3_OAR1_68804850	56.2883	109.132	0.606007
oar3_OAR1_69121904	94.9505	83.2835	0.25425
oar3_OAR1_69298014	-82.3673	123.926	0.506276
oar3_OAR1_70057370	-254.974	139.667	0.0679121
oar3_OAR1_70616565	-220.024	233.68	0.346417
oar3_OAR1_70916183	-30.5462	139.803	0.827044
oar3_OAR1_70922162	-9.6947	81.5993	0.905427
oar3_OAR1_71349876	-93.4531	95.3943	0.327259
oar3_OAR1_73020862	-4.8273	93.7545	0.958936
oar3_OAR1_73574803	-101.325	96.6394	0.294414
oar3_OAR1_73670138	66.8901	82.0476	0.414923
OAR1_78960505_X.1	-102.24	81.5139	0.209746
oar3_OAR1_73977664	69.8519	137.134	0.610493
oar3_OAR1_74148496	14.6305	79.2701	0.853571
oar3_OAR1_74272996	143.956	98.367	0.143343
oar3_OAR1_74521152	21.6671	88.4554	0.806495
oar3_OAR1_74824780	213.914	174.928	0.221379
oar3_OAR1_76329230	168.048	173.395	0.332465
oar3_OAR1_76807995	-186.406	242.493	0.442068
oar3_OAR1_76816946	-46.5594	165.916	0.779002
oar3_OAR1_77593841	129.288	91.5021	0.15767
OAR1_84034525.1	-10.1137	114.584	0.929667
oar3_OAR1_78802936	159.824	210.56	0.447826
oar3_OAR1_78816029	-67.6433	88.8078	0.44625
oar3_OAR1_79289930	185.808	151.692	0.220611
oar3_OAR1_79441248	397.497	285.094	0.163237
oar3_OAR1_80569292	-48.027	132.078	0.716138
oar3_OAR1_80688481	-8.31966	78.1596	0.91523
OAR1_86394329.1	78.6575	83.2981	0.345022
oar3_OAR1_81463533	133.203	85.0092	0.117132
oar3_OAR1_81685015	69.8008	270	0.796005
oar3_OAR1_81731065	77.8881	117.766	0.508369
oar3_OAR1_81867213	-23.2507	218.187	0.915135
oar3_OAR1_81983388	-456.855	181.049	0.0116234
oar3_OAR1_82116801	-27.7258	258.497	0.914585
oar3_OAR1_82980990	-50.4542	84.5744	0.550798
oar3_OAR1_83389381	53.9354	157.779	0.73247
OAR1_89955814.1	-87.4473	175.038	0.617364
oar3_OAR1_85450457	39.0403	86.0787	0.650159
oar3_OAR1_85637981	120.827	235.584	0.608032
oar3_OAR1_85769237	158.389	296.817	0.5936
oar3_OAR1_85956642	119.741	269.026	0.656255
oar3_OAR1_85965310	53.9192	83.7928	0.519911
oar3_OAR1_86106541	-32.9044	86.5748	0.703894
oar3_OAR1_87752299	29.227	95.6222	0.759871
oar3_OAR1_87808313	9.18263	265.716	0.972432
oar3_OAR1_87909412	19.6085	93.3637	0.83365
oar3_OAR1_87914359	19.6085	93.3637	0.83365
oar3_OAR1_87939612	19.6085	93.3637	0.83365
oar3_OAR1_87939687	19.6085	93.3637	0.83365
oar3_OAR1_87943863	19.6085	93.3637	0.83365
oar3_OAR1_88041247	20.206	89.3088	0.821008
oar3_OAR1_89656813	41.8558	93.3402	0.653849
oar3_OAR1_89673429	77.6677	86.8159	0.370988
oar3_OAR1_89715920	102.227	83.8962	0.223038
oar3_OAR1_89716314	102.227	83.8962	0.223038
oar3_OAR1_89718858	102.227	83.8962	0.223038
oar3_OAR1_89894499	47.3889	81.4802	0.560836
OAR1_95658466_X.1	103.963	83.5984	0.213645
oar3_OAR1_92512415	6.67704	86.486	0.938462
oar3_OAR1_92704353	17.857	83.6602	0.830979
oar3_OAR1_92834742	233.729	167.8	0.163649
oar3_OAR1_93667861	53.7148	85.6108	0.530378
oar3_OAR1_93671793	41.1649	87.154	0.636696
oar3_OAR1_93673692	46.4478	87.1246	0.593951
oar3_OAR1_93839012	152.716	76.0925	0.0447516
oar3_OAR1_93852121	66.1694	97.2087	0.496065
oar3_OAR1_93879277	142.753	109.066	0.190578
oar3_OAR1_94329463	84.5389	89.6383	0.345624
oar3_OAR1_94430804	241.224	375.123	0.520189
oar3_OAR1_94711018	-9.02373	345.861	0.979185
oar3_OAR1_95304988	38.0401	314.396	0.903695
oar3_OAR1_96320681	81.605	75.4124	0.279201
oar3_OAR1_97313041	-18.806	122.303	0.877794
oar3_OAR1_97358665	-18.806	122.303	0.877794
oar3_OAR1_97451789	-11.493	120.268	0.923869
oar3_OAR1_97451948	-11.493	120.268	0.923869
oar3_OAR1_97772830	-305.36	183.865	0.0967566
OAR1_104544639.1	-123.119	83.1644	0.138759
oar3_OAR1_98560160	77.8968	229.304	0.734075
oar3_OAR1_98777351	-32.3391	92.0337	0.725301
oar3_OAR1_99222912	152.68	76.5285	0.0460348
oar3_OAR1_101181219	160.009	134.978	0.235841
oar3_OAR1_101331928	-75.1868	89.2198	0.399388
oar3_OAR1_102368339	204.457	233.188	0.380599
oar3_OAR1_103428136	-261.716	344.117	0.446929
oar3_OAR1_103623514	-77.9268	97.1523	0.422489
oar3_OAR1_103731768	66.2631	95.4324	0.487466
oar3_OAR1_104144440	-61.0927	105.071	0.560944
oar3_OAR1_104668682	-212.82	80.3371	0.0080709
oar3_OAR1_106144541	85.0033	143.954	0.554863
oar3_OAR1_106459721	126.123	330.078	0.702388
oar3_OAR1_106598240	-150.383	91.3735	0.0998031
oar3_OAR1_106824750	-79.4583	80.0748	0.321051
oar3_OAR1_106825229	-86.2145	80.2159	0.282473
oar3_OAR1_107852227	-166.265	71.2971	0.0197005
oar3_OAR1_107852360	-173.893	70.3259	0.0134108
oar3_OAR1_108566918	108.756	98.2425	0.268288
oar3_OAR1_108728727	107.07	248.336	0.666359
oar3_OAR1_108944969	-90.8072	87.8095	0.301071
oar3_OAR1_108947090	-108.75	88.2059	0.217611
oar3_OAR1_109060814	101.545	79.3646	0.200732
s28234.1	-4.59928	86.5577	0.957624
oar3_OAR1_109140345	-142.674	288.006	0.620329
oar3_OAR1_109381901	70.9862	112.431	0.527796
oar3_OAR1_109470742	23.2287	216.048	0.914379
oar3_OAR1_110160726	49.6984	78.5632	0.527001
oar3_OAR1_110288305	40.1783	110.39	0.715883
oar3_OAR1_110415267	-72.5102	73.4069	0.323258
oar3_OAR1_110432131	186.343	232.49	0.422836
oar3_OAR1_110581406	27.9621	288.254	0.922723
oar3_OAR1_111788064	-97.9492	82.8424	0.237064
oar3_OAR1_111798423	39.3143	79.4414	0.620682
oar3_OAR1_111799260	39.3143	79.4414	0.620682
oar3_OAR1_111799617	-70.6168	77.7174	0.363542
oar3_OAR1_111844473	-97.3076	125.815	0.439274
oar3_OAR1_112888435	79.4518	113.03	0.482101
oar3_OAR1_113713217	-7.32989	215.354	0.972848
oar3_OAR1_114372703	28.5885	124.379	0.818209
OAR1_124056189.1	28.0134	82.0866	0.732903
oar3_OAR1_115327089	-175.465	169.093	0.299419
oar3_OAR1_115624384	277.084	NA	NA
oar3_OAR1_116015232	-13.9659	183.801	0.939432
oar3_OAR1_116115713	-492.601	183.417	0.00723812
oar3_OAR1_116195617	-71.7766	100.927	0.476979
oar3_OAR1_116563660	-63.5325	103.29	0.538497
oar3_OAR1_116565913	-63.5325	103.29	0.538497
oar3_OAR1_117441549	13.7275	195.713	0.944081
oar3_OAR1_118063089	34.3152	86.4425	0.691388
oar3_OAR1_118310479	277.084	NA	NA
oar3_OAR1_119090723	-174.681	260.185	0.501985
oar3_OAR1_119116327	-53.647	116.207	0.644333
s00684.1	-32.5473	122.812	0.790996
oar3_OAR1_120199259	-85.8333	158.455	0.588034
oar3_OAR1_120215145	1.82175	88.0494	0.983493
oar3_OAR1_120985395	-185.45	205.248	0.366239
oar3_OAR1_121168066	-29.65	82.922	0.720669
oar3_OAR1_121847305	17.7033	156.471	0.909919
oar3_OAR1_122321802	-128.521	77.678	0.0980196
OAR1_132826186.1	-154.784	194.351	0.42579
oar3_OAR1_122730306	81.4828	156.172	0.601843
oar3_OAR1_123245388	-22.1193	80.662	0.783914
OAR1_133535707.1	22.1193	80.662	0.783914
oar3_OAR1_123299819	33.481	82.0177	0.683114
oar3_OAR1_123665545	277.084	NA	NA
oar3_OAR1_123705412	541.015	307.331	0.0783461
oar3_OAR1_123707016	-88.5616	83.6512	0.289736
oar3_OAR1_124443009	164.892	164.596	0.316441
oar3_OAR1_124588532	-268.385	153.627	0.0806385
oar3_OAR1_124606233	278.622	373.751	0.455985
oar3_OAR1_124937571	-110.014	303.704	0.717171
oar3_OAR1_125101415	-147.967	75.6538	0.0504834
oar3_OAR1_125201045	-230.597	82.2594	0.00505839
oar3_OAR1_125246068	187.459	73.5684	0.0108313
oar3_OAR1_125394347	-285.014	301.676	0.344777
oar3_OAR1_125858004	-260.089	187.812	0.166102
oar3_OAR1_126206063	27.4094	303.639	0.928073
oar3_OAR1_126652462	80.4804	275.286	0.770017
s37315.1	-37.0116	102.817	0.718865
oar3_OAR1_128297232	-42.8738	100.553	0.669832
OAR1_139235849.1	252.083	137.11	0.0659815
oar3_OAR1_128539079	-0.473373	88.7503	0.995744
oar3_OAR1_128773548	-85.4749	111.111	0.441731
oar3_OAR1_129026741	-160.703	247.532	0.516196
oar3_OAR1_129428977	-97.4382	81.5084	0.231916
oar3_OAR1_129430258	-94.9937	81.4453	0.243473
oar3_OAR1_129482610	-85.7352	95.9053	0.371345
oar3_OAR1_129493064	-111.856	81.1533	0.168099
oar3_OAR1_130185209	-31.4712	79.099	0.690725
oar3_OAR1_130557229	-80.1439	102.743	0.435364
oar3_OAR1_130776902	436.893	286.15	0.126812
oar3_OAR1_130811582	-31.1377	88.8371	0.725961
oar3_OAR1_132346834	-109.257	282.081	0.698514
oar3_OAR1_132964053	487.438	337.328	0.148459
oar3_OAR1_133612008	62.1955	144.685	0.667291
oar3_OAR1_134604201	-70.2664	146.861	0.632327
oar3_OAR1_134693040	72.3781	90.9694	0.426246
oar3_OAR1_134706724	40.1544	82.8087	0.627744
oar3_OAR1_134711158	40.1544	82.8087	0.627744
oar3_OAR1_135156419	-32.7694	117.686	0.780669
oar3_OAR1_135191687	-113.428	89.0043	0.202516
oar3_OAR1_135986369	95.8017	82.1284	0.243417
oar3_OAR1_136002617	-215.373	84.3898	0.010707
oar3_OAR1_136219978	-321.892	242.822	0.184963
oar3_OAR1_136222601	-321.892	242.822	0.184963
oar3_OAR1_136844984	137.138	74.9219	0.067189
oar3_OAR1_136871129	86.8984	129.134	0.500989
oar3_OAR1_137134751	319.308	237.501	0.178803
oar3_OAR1_137340065	23.1901	116.077	0.84165
oar3_OAR1_138022720	95.3892	117.016	0.414967
oar3_OAR1_138258705	224.206	146.5	0.125915
oar3_OAR1_138409739	327.219	249.637	0.189932
oar3_OAR1_138414364	-97.2805	89.6565	0.277906
oar3_OAR1_138645692	-27.0881	85.6544	0.751813
oar3_OAR1_138698437	60.606	119.986	0.613481
oar3_OAR1_138784112	-34.6998	78.8178	0.659754
oar3_OAR1_139517105	88.5001	83.0348	0.286505
oar3_OAR1_139700419	61.2377	98.8004	0.535382
oar3_OAR1_140042062	91.8025	110.029	0.404083
oar3_OAR1_140788202	-262.051	144.637	0.0700195
oar3_OAR1_141203405	156.011	160.152	0.329985
oar3_OAR1_142208792	238.621	373.966	0.52342
oar3_OAR1_142575155	24.0987	176.565	0.891437
oar3_OAR1_143263206	21.6821	158.693	0.891324
OAR1_154773125.1	51.9231	96.4186	0.59022
oar3_OAR1_143849198	94.6855	102.917	0.357563
oar3_OAR1_144197071	-49.3203	78.7941	0.531355
OAR1_156411137.1	0.856613	108.576	0.993705
oar3_OAR1_145501469	-161.217	220.593	0.464879
oar3_OAR1_145592000	281.718	230.997	0.222627
oar3_OAR1_145859505	-27.5578	78.5686	0.725777
oar3_OAR1_146170869	119.938	94.6576	0.205129
oar3_OAR1_146295834	-9.45197	152.906	0.95071
oar3_OAR1_146970311	-7.73306	90.8645	0.932178
OAR1_159080734_X.1	-117.634	89.8335	0.190374
oar3_OAR1_147284717	-34.7867	77.5205	0.653618
oar3_OAR1_147304092	-152.989	85.61	0.0739306
oar3_OAR1_147307668	-152.989	85.61	0.0739306
oar3_OAR1_147624464	-10.6383	78.9921	0.892868
OAR1_160143931_X.1	-503.748	279.379	0.0713726
oar3_OAR1_149565584	-24.6418	79.739	0.757299
oar3_OAR1_149853679	54.1115	121.71	0.656613
oar3_OAR1_149888250	182.229	309.623	0.556163
OAR1_164454098.1	-143.595	226.526	0.526146
oar3_OAR1_153136235	-135.329	157.719	0.390871
oar3_OAR1_153144715	-132.75	163.24	0.416093
oar3_OAR1_153990751	8.46952	127.182	0.946905
oar3_OAR1_155202804	40.2366	216.583	0.852618
oar3_OAR1_155589729	-56.971	82.7118	0.490956
OAR1_168024436.1	-314.773	121.146	0.00936883
oar3_OAR1_156547069	44.8046	80.2886	0.576814
oar3_OAR1_158162027	752.422	423.454	0.0755896
oar3_OAR1_158179995	184.916	319.416	0.562644
oar3_OAR1_159900446	-456.152	386.188	0.237537
oar3_OAR1_160046856	-11.3644	111.844	0.919066
oar3_OAR1_160632796	-277.827	192.553	0.14906
oar3_OAR1_160873795	-31.592	213.017	0.8821
oar3_OAR1_161255855	-40.4032	89.8134	0.652814
oar3_OAR1_161277080	18.9952	92.6845	0.837615
oar3_OAR1_161303811	-22.4084	118.132	0.849552
oar3_OAR1_161985746	-7.16549	80.3171	0.928911
oar3_OAR1_162141675	-75.5546	207.083	0.715222
OAR1_174976013.1	249.929	158.483	0.114794
oar3_OAR1_162349305	134.07	104.946	0.201418
oar3_OAR1_162387099	130.868	91.2694	0.151611
oar3_OAR1_162675814	122.557	134.623	0.362624
oar3_OAR1_162838825	65.3944	83.3722	0.432825
oar3_OAR1_163729115	-5.25814	130.354	0.967824
oar3_OAR1_163967110	-151.12	205.432	0.461959
oar3_OAR1_164034351	-80.41	84.356	0.340478
oar3_OAR1_164034788	-80.41	84.356	0.340478
s06854.1	-16.9263	243.228	0.94452
oar3_OAR1_165992604	-21.4159	171.016	0.900343
oar3_OAR1_166179491	-445.169	285.853	0.119391
oar3_OAR1_166270039	4.32745	119.053	0.971004
oar3_OAR1_166270662	114.37	118.585	0.334817
oar3_OAR1_166540206	158.699	226.536	0.483585
oar3_OAR1_168891259	-0.888954	99.5584	0.992876
oar3_OAR1_168951668	2.11481	83.3884	0.979767
oar3_OAR1_168954976	2.11481	83.3884	0.979767
oar3_OAR1_169210950	24.9521	86.5183	0.773039
oar3_OAR1_169417811	-126.148	232.276	0.587066
oar3_OAR1_169698969	473.675	305.512	0.121039
oar3_OAR1_170025478	111.159	227.64	0.625328
oar3_OAR1_170964787	19.718	115.479	0.864421
oar3_OAR1_171586736	50.8667	91.2754	0.577331
oar3_OAR1_172552108	-25.358	94.6357	0.788735
oar3_OAR1_172671435	-65.1851	80.6236	0.418796
oar3_OAR1_172934879	-187.533	134.815	0.164215
oar3_OAR1_173012504	50.555	239.242	0.832643
oar3_OAR1_174047973	-94.9653	334.244	0.776319
oar3_OAR1_174135075	-21.2408	112.367	0.850069
oar3_OAR1_174164396	31.8758	77.3178	0.680141
oar3_OAR1_174570497	-155.952	241.001	0.517567
oar3_OAR1_174687068	547.343	368.559	0.13752
oar3_OAR1_176026114	356.426	190.464	0.061296
oar3_OAR1_176080539	196.07	151.137	0.194528
oar3_OAR1_176339288	-119.677	129.984	0.357204
oar3_OAR1_176339486	-98.5904	123.429	0.424427
oar3_OAR1_176523060	-255.749	251.485	0.309176
oar3_OAR1_176534002	332.48	135.635	0.0142348
oar3_OAR1_177293381	-231.148	345.626	0.503635
oar3_OAR1_177711014	-14.9442	95.3588	0.875469
oar3_OAR1_178823719	356.359	121.605	0.00338448
oar3_OAR1_179240348	6.57735	84.8145	0.938186
oar3_OAR1_179822838	224.861	130.022	0.0837371
oar3_OAR1_179855452	199.834	228.628	0.382088
oar3_OAR1_180305935	272.526	128.037	0.0332965
oar3_OAR1_180349532	289.269	233.575	0.215552
OAR1_195413734_X.1	-3.66547	378.952	0.992282
oar3_OAR1_181171647	149.613	137.946	0.278107
oar3_OAR1_181184955	149.547	138.062	0.278726
oar3_OAR1_181384539	-49.4468	262.418	0.850542
oar3_OAR1_181402288	-62.3339	209.07	0.76559
oar3_OAR1_181655353	-178.042	134.742	0.186384
oar3_OAR1_182218127	-152.543	130.269	0.241606
oar3_OAR1_182627539	-52.2373	132.583	0.693583
OAR1_197593478.1	393.403	151.853	0.00957877
oar3_OAR1_183235385	109.767	149.097	0.461601
oar3_OAR1_183373465	-331.398	231.358	0.152028
oar3_OAR1_183693197	-68.9122	80.293	0.390749
s13227.1	334.519	267.651	0.211361
oar3_OAR1_184972231	-60.8524	92.0691	0.508649
oar3_OAR1_185061114	158.441	100.999	0.11671
oar3_OAR1_185075823	158.441	100.999	0.11671
oar3_OAR1_186002938	-43.8822	180.626	0.808048
oar3_OAR1_186131424	-179.857	244.398	0.461779
oar3_OAR1_186466838	-44.6469	87.4471	0.60966
oar3_OAR1_186840412	38.7608	213.454	0.855905
oar3_OAR1_187560753	223.436	209.346	0.285835
oar3_OAR1_187631830	-30.2889	80.8327	0.707875
oar3_OAR1_187632328	-30.2889	80.8327	0.707875
oar3_OAR1_189461161	-119.282	83.8437	0.154833
OAR1_204473797.1	294.538	121.521	0.0153602
oar3_OAR1_190937650	139.184	96.4216	0.148882
oar3_OAR1_191545971	79.0352	128.774	0.539379
oar3_OAR1_191825341	104.79	386.628	0.786364
oar3_OAR1_192409695	-88.376	229.315	0.699948
oar3_OAR1_192970013	-75.9777	118.819	0.522536
oar3_OAR1_193162995	78.2393	90.3045	0.386274
oar3_OAR1_193504314	-151.886	109.41	0.165068
oar3_OAR1_193963339	6.82353	93.1225	0.941587
oar3_OAR1_194045407	-17.665	77.4189	0.819511
oar3_OAR1_194182907	407.754	201.627	0.0431438
oar3_OAR1_194421641	197.889	76.0114	0.00923014
oar3_OAR1_194559497	-193.332	167.857	0.249419
oar3_OAR1_195173494	-63.3648	79.5648	0.425804
oar3_OAR1_195307141	28.7178	144.103	0.842038
oar3_OAR1_195534025	-22.2652	94.618	0.813963
oar3_OAR1_195730673	305.642	199.904	0.126278
oar3_OAR1_195969939	-91.377	158.787	0.564974
oar3_OAR1_196759044	-105.436	89.9559	0.241163
oar3_OAR1_197111000	-17.9962	105.383	0.864404
oar3_OAR1_197287484	-87.1273	78.9098	0.269533
oar3_OAR1_197443541	-55.1747	153.664	0.719549
oar3_OAR1_198141742	277.084	NA	NA
oar3_OAR1_198877719	96.98	109.556	0.376042
oar3_OAR1_199853068	69.3888	153.811	0.651895
oar3_OAR1_199908167	23.6735	90.6072	0.79388
oar3_OAR1_200078386	143.264	192.612	0.457
oar3_OAR1_200693357	-130.955	272.754	0.631141
oar3_OAR1_200712764	79.3393	82.8201	0.338077
oar3_OAR1_200959019	138.301	165.759	0.404083
oar3_OAR1_201216052	-200.587	169.431	0.236457
oar3_OAR1_201439662	-34.2604	86.8674	0.693287
oar3_OAR1_202049062	-299.656	134.77	0.0261852
oar3_OAR1_202802562	-96.6076	159.191	0.543939
oar3_OAR1_203033581	-41.9875	88.1853	0.633983
oar3_OAR1_203264277	529.743	156.767	0.000727021
oar3_OAR1_204583969	-88.9238	105.951	0.401305
oar3_OAR1_204625573	-166.235	96.4425	0.0847676
oar3_OAR1_205485447	19.5697	146.911	0.894029
oar3_OAR1_205689877	-172.048	149.528	0.249895
oar3_OAR1_205845025	28.3772	81.2313	0.726835
oar3_OAR1_206641169	95.5553	86.9988	0.272051
oar3_OAR1_206888564	-339.534	298.918	0.256008
oar3_OAR1_207318494	-136.135	92.0417	0.139125
oar3_OAR1_208022409	-35.7879	92.4596	0.698708
oar3_OAR1_208132845	-78.5472	120.34	0.513944
oar3_OAR1_209509761	202.241	193.472	0.295874
oar3_OAR1_209969573	96.3644	129.381	0.456387
oar3_OAR1_210244000	61.1227	78.9994	0.439101
oar3_OAR1_212003333	56.3787	82.3911	0.493798
oar3_OAR1_212170528	74.423	141.626	0.599242
oar3_OAR1_212605160	-119.819	89.5693	0.180988
oar3_OAR1_212897375	-13.1663	130.658	0.919734
oar3_OAR1_212898864	41.8299	86.3957	0.628268
oar3_OAR1_213931459	-220.174	141.381	0.119396
oar3_OAR1_214539797	265.15	79.6572	0.000872715
oar3_OAR1_214854331	-95.245	285.958	0.739078
oar3_OAR1_215513818	379.964	261.824	0.14672
oar3_OAR1_215610559	277.084	NA	NA
oar3_OAR1_215627426	58.1863	107.499	0.58832
oar3_OAR1_215703061	-446.186	307.864	0.147255
oar3_OAR1_216641225	66.5718	101.322	0.511162
oar3_OAR1_217004190	-92.6113	94.0077	0.324552
oar3_OAR1_217225988	-19.8805	85.614	0.816374
oar3_OAR1_217555799	94.7064	83.021	0.253973
oar3_OAR1_217565238	106.607	83.5984	0.202229
oar3_OAR1_217921335	398.773	266.283	0.13425
oar3_OAR1_217987866	162.221	214.538	0.449563
oar3_OAR1_217995792	114.742	147.03	0.435154
oar3_OAR1_220223435	63.3637	87.0881	0.466869
oar3_OAR1_221373081	140.86	280.762	0.615873
oar3_OAR1_221486104	160.072	84.4715	0.0580939
oar3_OAR1_221604961	69.5818	107.207	0.516313
oar3_OAR1_222259275	-25.1147	82.4381	0.760634
s22335.1	-115.681	82.7936	0.162347
oar3_OAR1_223439234	-115.681	82.7936	0.162347
oar3_OAR1_223484997	-275.691	268.73	0.304937
oar3_OAR1_223518920	-46.6536	85.1669	0.583836
oar3_OAR1_225605385	73.6168	97.8485	0.451838
oar3_OAR1_225687756	154.155	83.9675	0.0663736
oar3_OAR1_226216964	-78.4792	95.4831	0.411124
oar3_OAR1_227060238	85.19	138.335	0.53801
oar3_OAR1_227891007	157.718	84.6491	0.0624353
oar3_OAR1_228042832	-5.89756	94.234	0.950098
oar3_OAR1_228144501	114.151	101.836	0.262319
oar3_OAR1_229050174	86.6994	93.2081	0.352283
oar3_OAR1_229071910	-147.361	250.399	0.556194
oar3_OAR1_229147309	-95.3657	78.4168	0.223932
oar3_OAR1_229620629	-68.6073	426.133	0.872093
oar3_OAR1_229715724	50.435	285.515	0.859786
oar3_OAR1_229740651	50.435	285.515	0.859786
oar3_OAR1_229742802	50.435	285.515	0.859786
oar3_OAR1_229814886	-122.557	81.0555	0.130531
oar3_OAR1_230074662	2.37394	89.9225	0.978938
oar3_OAR1_230225399	32.5184	172.528	0.850499
oar3_OAR1_230570441	-92.3668	104.719	0.377754
oar3_OAR1_230640432	73.1486	84.1692	0.384811
oar3_OAR1_231469993	64.218	118.507	0.587894
oar3_OAR1_231472934	64.218	118.507	0.587894
oar3_OAR1_231474945	64.218	118.507	0.587894
oar3_OAR1_231476117	64.218	118.507	0.587894
oar3_OAR1_231576616	-75.2035	112.637	0.504347
oar3_OAR1_232149500	34.0053	93.8858	0.717204
oar3_OAR1_232303262	1.97885	81.8808	0.980719
oar3_OAR1_232313816	1.97885	81.8808	0.980719
oar3_OAR1_232323346	-268.031	141.463	0.0581301
oar3_OAR1_232355854	284.399	168.99	0.092388
oar3_OAR1_232448807	284.399	168.99	0.092388
oar3_OAR1_232881715	-125.685	98.9774	0.204143
oar3_OAR1_233000110	-166.871	124.571	0.180386
oar3_OAR1_233130372	-101.586	103.571	0.326672
oar3_OAR1_233184850	259.711	201.195	0.196759
oar3_OAR1_233262394	-79.8841	169.84	0.638105
oar3_OAR1_233670932	69.6729	85.1117	0.413012
oar3_OAR1_233819433	-194.547	242.484	0.422375
oar3_OAR1_234720203	129.26	115.309	0.262295
oar3_OAR1_234720664	259.392	288.909	0.369274
oar3_OAR1_235254884	49.8295	88.6777	0.574173
oar3_OAR1_237574212	-16.1199	104.284	0.877155
OAR1_257333383.1	-321.745	210.089	0.125653
oar3_OAR1_238930707	6.19673	96.6904	0.9489
oar3_OAR1_238966489	-151.731	252.291	0.547565
oar3_OAR1_239204368	-18.2599	128.364	0.886882
oar3_OAR1_239681405	-149.54	85.5495	0.0804648
oar3_OAR1_239681875	-147.431	83.6294	0.077915
oar3_OAR1_240371533	-42.5934	140.371	0.761559
oar3_OAR1_240404448	-59.0536	133.132	0.657352
OAR1_260394119.1	-56.1818	82.9824	0.498385
oar3_OAR1_240903777	-48.219	84.1414	0.566596
oar3_OAR1_240906494	-44.0848	84.4279	0.601559
oar3_OAR1_241169006	256.716	157.176	0.102407
oar3_OAR1_241200571	33.4761	86.8443	0.699888
oar3_OAR1_242712313	-146.477	153.46	0.339832
oar3_OAR1_243084536	-63.1863	79.9434	0.429301
oar3_OAR1_243156565	100.62	187.124	0.590773
oar3_OAR1_243174978	61.9803	187.875	0.741475
oar3_OAR1_243183648	61.9803	187.875	0.741475
oar3_OAR1_243214364	8.93099	78.9762	0.909964
oar3_OAR1_243269184	-205.598	117.574	0.0803465
oar3_OAR1_243282817	-36.7118	76.9229	0.633181
oar3_OAR1_243409276	-140.676	90.1859	0.118797
oar3_OAR1_243519942	-263.952	165.263	0.110228
oar3_OAR1_244455244	-125.061	238.216	0.59959
OAR1_264734445.1	5.32288	108.88	0.961009
oar3_OAR1_245668521	-79.1062	80.0467	0.32303
oar3_OAR1_245679213	91.6163	250.955	0.715058
oar3_OAR1_246541908	-158.939	109.906	0.148139
oar3_OAR1_246602187	-106.082	92.9375	0.253691
oar3_OAR1_249247574	178.714	135.434	0.18698
oar3_OAR1_250377905	93.6789	99.3849	0.345892
oar3_OAR1_250413849	34.4801	93.3037	0.71172
oar3_OAR1_251567211	-106.944	394.877	0.786523
oar3_OAR1_251979219	127.84	337.901	0.705182
oar3_OAR1_251993694	127.84	337.901	0.705182
oar3_OAR1_252076630	-79.1615	110.967	0.475612
oar3_OAR1_252077446	-79.1615	110.967	0.475612
oar3_OAR1_252096173	-79.1615	110.967	0.475612
oar3_OAR1_252109830	80.9503	87.356	0.354097
oar3_OAR1_252544510	113.003	113.419	0.319086
oar3_OAR1_252569767	11.5413	270.641	0.965985
oar3_OAR1_252586448	-3.25527	84.6414	0.969321
oar3_OAR1_252604601	-54.4341	189.853	0.774328
oar3_OAR1_252696618	-1.81891	88.3508	0.983575
oar3_OAR1_253013976	-132.888	83.5003	0.111504
oar3_OAR1_253435568	-60.8863	84.406	0.470694
oar3_OAR1_253915429	277.084	NA	NA
oar3_OAR1_254355302	101.922	106.88	0.340284
oar3_OAR1_254362369	101.922	106.88	0.340284
oar3_OAR1_254364678	101.922	106.88	0.340284
oar3_OAR1_254373726	101.922	106.88	0.340284
oar3_OAR1_254479743	101.922	106.88	0.340284
oar3_OAR1_254498646	-27.8739	117.885	0.813083
oar3_OAR1_254642513	-34.643	77.8135	0.656171
oar3_OAR1_254682694	87.2208	82.5503	0.290705
oar3_OAR1_254714030	-172.845	84.4718	0.0407386
oar3_OAR1_254717064	-172.845	84.4718	0.0407386
oar3_OAR1_254751012	-103.419	83.4832	0.215418
oar3_OAR1_254766574	-103.419	83.4832	0.215418
oar3_OAR1_256240606	-13.5117	93.4699	0.885061
oar3_OAR1_256962822	106.277	74.0408	0.151176
oar3_OAR1_257216046	277.084	NA	NA
oar3_OAR1_258108425	12.4134	86.8608	0.88636
oar3_OAR1_258344277	56.8717	130.317	0.662538
OAR1_279313513.1	-126.178	91.2393	0.166687
oar3_OAR1_258631116	2.86591	83.9382	0.972763
oar3_OAR1_258925532	53.1965	94.644	0.574069
OAR1_280464588.1	311.171	185.812	0.0940019
oar3_OAR1_259321552	277.084	NA	NA
oar3_OAR1_259438331	209.989	162.22	0.195503
oar3_OAR1_259570559	384.753	375.201	0.305148
OAR1_281237981.1	43.1599	128.843	0.73764
oar3_OAR1_259983854	65.9017	135.168	0.625865
oar3_OAR1_260129666	67.9633	82.914	0.412396
oar3_OAR1_260415610	61.4184	127.356	0.629622
oar3_OAR1_260468743	36.5717	102.995	0.722527
oar3_OAR1_260479351	245.039	254.849	0.336296
oar3_OAR1_261162335	-99.2043	91.5325	0.278447
oar3_OAR1_261177616	36.1228	242.812	0.881736
oar3_OAR1_261367066	49.2597	99.8382	0.621733
oar3_OAR1_261714041	44.0827	226.083	0.845405
oar3_OAR1_262273678	46.3873	202.237	0.818581
oar3_OAR1_262337310	37.0621	113.435	0.743876
oar3_OAR1_262550371	66.2163	93.0128	0.476523
oar3_OAR1_263107774	-2.95326	249.959	0.990573
oar3_OAR1_263199882	23.3278	80.7337	0.772622
oar3_OAR1_263370810	-58.1773	201.019	0.772267
oar3_OAR1_263377483	-40.7584	200.031	0.838541
oar3_OAR1_263667096	-335.641	274.625	0.22164
oar3_OAR1_263782431	77.4072	80.2563	0.334796
oar3_OAR1_263798000	84.4059	81.4549	0.300096
oar3_OAR1_264031116	145.775	78.4492	0.0631385
oar3_OAR1_264072401	145.775	78.4492	0.0631385
OAR1_286637130.1	-153.517	166.615	0.356849
oar3_OAR1_265037548	-190.992	139.309	0.170375
oar3_OAR1_265602690	279.45	196.517	0.155022
oar3_OAR1_265713077	270.647	179.966	0.132612
oar3_OAR1_266035959	-115.287	132.703	0.384977
oar3_OAR1_266463278	34.2013	96.0593	0.721808
oar3_OAR1_266966266	199.949	303.523	0.510051
oar3_OAR1_267439245	-44.0729	173.121	0.799049
oar3_OAR1_268259733	-452.543	332.168	0.173075
oar3_OAR1_268632842	-41.0861	374.266	0.912586
oar3_OAR1_268716181	16.2173	218.945	0.940954
oar3_OAR1_268928854	36.0631	73.5019	0.62368
oar3_OAR1_269169072	154.308	212.097	0.466897
oar3_OAR1_269545447	40.005	116.959	0.732319
oar3_OAR1_270358539	-526.232	332.687	0.113704
oar3_OAR1_270420887	288.623	423.971	0.496023
oar3_OAR1_271021137	-62.1331	317.5	0.844849
oar3_OAR1_271425266	-44.9028	145.861	0.758199
OAR1_293977463_X.1	-176.382	174.826	0.313022
oar3_OAR1_271809891	40.5129	85.7098	0.636445
oar3_OAR1_272068735	76.5548	171.597	0.655503
oar3_OAR1_272564121	144.189	82.5195	0.0805789
oar3_OAR1_272824777	-129.349	334.652	0.699114
OAR1_295977280.1	-191.587	115.524	0.0972333
oar3_OAR1_273560480	-584.388	440.382	0.184508
oar3_OAR1_273766354	152.312	79.5993	0.0556866
oar3_OAR1_273987756	-154.533	167.511	0.356254
oar3_OAR1_274001909	-37.2628	262.571	0.887147
oar3_OAR1_274096338	-19.985	113.74	0.860523
oar3_OAR1_274395628	-151.433	128.814	0.239756
oar3_OAR1_274531863	48.8854	86.1304	0.570325
oar3_OAR1_274583676	347.941	157.613	0.0272741
oar3_OAR2_60570	74.8318	79.6383	0.347399
oar3_OAR2_64460	288.765	178.529	0.105778
oar3_OAR2_245067	320.896	190.336	0.0918055
oar3_OAR2_262433	392.652	163.662	0.0164329
oar3_OAR2_1225593	306.134	305.315	0.316014
oar3_OAR2_2041327	-57.1735	81.8199	0.484694
oar3_OAR2_2085021	-138.113	197.673	0.484742
oar3_OAR2_2085553	277.084	NA	NA
oar3_OAR2_2534640	34.0115	132.697	0.797713
oar3_OAR2_2817877	66.2263	91.45	0.468955
oar3_OAR2_3394598	228.1	263.59	0.386842
oar3_OAR2_3404503	-64.4197	164.146	0.694723
OAR2_2900992.1	156.48	84.844	0.0651352
oar3_OAR2_3587738	62.5313	79.8105	0.433336
oar3_OAR2_4052785	41.5424	92.8169	0.654461
oar3_OAR2_5063518	-88.3602	126.944	0.486394
oar3_OAR2_5412977	18.6367	159.183	0.906799
oar3_OAR2_5556786	117.85	293.184	0.68771
s12815.1	-140.524	108.34	0.194607
oar3_OAR2_6296383	35.7707	155.595	0.818172
oar3_OAR2_6364865	-264.101	130.611	0.0431722
oar3_OAR2_6461883	9.11906	144.119	0.949548
oar3_OAR2_7029769	238.589	290.343	0.411219
oar3_OAR2_8102359	-29.3746	89.353	0.742347
oar3_OAR2_8568574	0.469948	83.9112	0.995531
oar3_OAR2_8907710	8.30846	81.2354	0.918537
oar3_OAR2_8927126	8.30846	81.2354	0.918537
oar3_OAR2_10557586	77.9511	76.3603	0.307334
oar3_OAR2_11421839	-143.571	76.7527	0.0614044
oar3_OAR2_11453788	-45.473	259.253	0.860765
oar3_OAR2_12447922	6.29211	103.122	0.951346
oar3_OAR2_12492423	-207.008	107.705	0.0546066
DU326574_557.1	-207.008	107.705	0.0546066
oar3_OAR2_12495788	-207.008	107.705	0.0546066
oar3_OAR2_12598771	-45.0891	79.399	0.570116
oar3_OAR2_12728705	-94.828	82.9544	0.252983
oar3_OAR2_13391473	48.7952	80.517	0.544499
oar3_OAR2_13470569	213.816	187.58	0.254341
oar3_OAR2_13541504	-14.5447	224.585	0.948363
oar3_OAR2_14050785	12.6633	127.583	0.920935
oar3_OAR2_14699238	31.752	124.234	0.798273
oar3_OAR2_14994882	44.1406	82.0992	0.590819
oar3_OAR2_15144855	-112.549	80.2144	0.160588
oar3_OAR2_15909435	-236.63	243.683	0.33152
oar3_OAR2_15994209	1.02068	76.3746	0.989337
oar3_OAR2_16329281	-116.01	110.738	0.294821
OAR2_15913482.1	-174.306	89.1225	0.0504886
oar3_OAR2_16924770	-631.33	248.748	0.0111479
oar3_OAR2_17344148	-114.745	93.408	0.219286
oar3_OAR2_17538688	163.222	161.635	0.312582
OAR2_17384136.1	76.3526	100.197	0.446046
oar3_OAR2_18319668	91.3743	117.167	0.435471
oar3_OAR2_18371761	-83.2175	101.275	0.411247
oar3_OAR2_18734897	-70.371	107.807	0.513917
oar3_OAR2_18735200	-102.106	214.55	0.634142
oar3_OAR2_19321389	39.9374	82.7293	0.629275
OAR2_20088753.1	175.119	182.907	0.338355
oar3_OAR2_20128610	-141.68	98.5272	0.15044
oar3_OAR2_20464306	-209.369	102.371	0.0408353
oar3_OAR2_21018536	-14.1905	117.09	0.903538
oar3_OAR2_21238657	-142.913	82.666	0.0838444
oar3_OAR2_21238889	-142.618	82.6678	0.0844914
oar3_OAR2_21248296	-142.913	82.666	0.0838444
oar3_OAR2_21322070	-89.2397	82.3049	0.278251
oar3_OAR2_21451753	-42.8928	90.7427	0.636437
oar3_OAR2_21487764	-40.9345	78.0702	0.600049
oar3_OAR2_21618983	-62.7466	87.1486	0.471528
OAR2_21997773.1	71.031	81.8042	0.385227
oar3_OAR2_21888897	-179.041	133.413	0.179596
oar3_OAR2_21888969	-179.041	133.413	0.179596
oar3_OAR2_22800880	-17.8208	76.5467	0.81591
oar3_OAR2_22927482	-57.3117	94.3307	0.543478
oar3_OAR2_23173714	28.0758	130.314	0.829419
oar3_OAR2_23185850	28.0758	130.314	0.829419
oar3_OAR2_23837463	-12.1933	215.172	0.95481
oar3_OAR2_24137948	-20.6199	168.839	0.902798
oar3_OAR2_24303212	-9.04519	243.334	0.970348
oar3_OAR2_24406825	-42.3021	196.366	0.829436
oar3_OAR2_25030030	703.901	307.388	0.0220247
oar3_OAR2_25249151	0.969722	186.222	0.995845
oar3_OAR2_25397960	72.3094	76.5217	0.344683
oar3_OAR2_25840064	-39.4694	84.5245	0.64053
oar3_OAR2_26285909	-48.7415	168.472	0.77234
oar3_OAR2_27401115	277.084	NA	NA
oar3_OAR2_27792925	94.947	242.042	0.694855
oar3_OAR2_28369688	67.4504	104.135	0.517165
oar3_OAR2_28475522	-427.366	383.629	0.265276
oar3_OAR2_28818839	-25.4361	173.148	0.883208
oar3_OAR2_28819024	137.961	224.761	0.53934
oar3_OAR2_28819118	49.319	94.4624	0.601599
oar3_OAR2_28819121	277.084	NA	NA
oar3_OAR2_28824873	86.0714	169.644	0.611898
oar3_OAR2_28881862	228.058	209.156	0.27555
oar3_OAR2_29299807	-248.304	173.576	0.152567
oar3_OAR2_29495380	-383.868	236.881	0.105122
oar3_OAR2_29541041	116.051	95.8876	0.226171
OAR2_30773743.1	-69.8413	81.919	0.3939
oar3_OAR2_30469384	-258.914	160.723	0.107195
oar3_OAR2_31758932	98.3896	82.3889	0.232396
oar3_OAR2_31763328	96.6059	82.3329	0.240652
oar3_OAR2_31883416	-197.952	145.138	0.172602
oar3_OAR2_32437987	152.492	192.706	0.428757
oar3_OAR2_32482478	64.3966	251.621	0.798007
oar3_OAR2_32839274	-111.581	113.089	0.323806
oar3_OAR2_32878618	14.5736	77.3631	0.85058
oar3_OAR2_32968195	88.805	80.7349	0.27135
oar3_OAR2_32969737	88.805	80.7349	0.27135
oar3_OAR2_34813600	-42.2284	177.255	0.811698
oar3_OAR2_35290590	19.7535	282.678	0.944289
oar3_OAR2_36606429	330.023	278.59	0.236168
oar3_OAR2_36724964	-217.257	232.684	0.350459
oar3_OAR2_36834458	-55.464	86.9424	0.523513
oar3_OAR2_36847923	-55.9122	79.6702	0.482807
oar3_OAR2_36939414	-37.3	97.1132	0.700913
oar3_OAR2_37039725	-24.5681	187.605	0.895809
oar3_OAR2_37057787	-43.2571	153.273	0.777773
oar3_OAR2_37974992	121.203	242.996	0.617931
oar3_OAR2_38151113	-35.0857	333.704	0.916264
oar3_OAR2_41017244	13.3471	82.7769	0.871903
oar3_OAR2_42034099	4.38674	132.745	0.973638
oar3_OAR2_42237668	-95.4829	92.7662	0.303346
oar3_OAR2_42289990	-29.3344	89.2355	0.742359
oar3_OAR2_42783841	-35.4325	307.236	0.908186
oar3_OAR2_42792231	-79.3912	81.5318	0.330183
oar3_OAR2_43280326	224.6	300.787	0.45524
oar3_OAR2_43601714	-845.117	235.396	0.000330431
oar3_OAR2_44366090	68.5007	99.5933	0.491576
oar3_OAR2_44601674	30.7637	172.086	0.858119
oar3_OAR2_44786587	215.954	168.084	0.198862
oar3_OAR2_45375902	399.707	338.901	0.238231
oar3_OAR2_45554422	76.3224	77.3599	0.323845
oar3_OAR2_45878149	250.831	110.984	0.0238176
oar3_OAR2_45884209	248.818	177.283	0.160465
oar3_OAR2_46081942	-77.1814	102.89	0.453175
oar3_OAR2_46409285	76.8199	115.926	0.507545
oar3_OAR2_46532098	22.6253	86.9113	0.794612
oar3_OAR2_46819535	132.221	108.999	0.225111
oar3_OAR2_46963661	64.9982	89.8316	0.469338
oar3_OAR2_47390707	78.0416	131.231	0.552053
oar3_OAR2_47863695	64.1441	373.015	0.863468
oar3_OAR2_48828538	-182.385	254.581	0.473735
oar3_OAR2_49110392	52.5061	77.1076	0.495906
oar3_OAR2_49359562	-70.198	79.3004	0.37604
oar3_OAR2_50089983	9.03458	84.3768	0.91473
oar3_OAR2_50308522	-78.5811	77.811	0.312544
oar3_OAR2_51196274	-30.0329	134.193	0.82291
OAR2_55201225.1	-32.7122	80.6436	0.685007
OAR2_55308142.1	44.3379	76.6549	0.562988
oar3_OAR2_51751897	40.8281	77.3972	0.597837
oar3_OAR2_51788434	15.0188	80.424	0.85186
oar3_OAR2_52426197	66.869	80.7724	0.407744
oar3_OAR2_52548670	296.585	333.381	0.373665
oar3_OAR2_52551538	112.384	228.613	0.623008
oar3_OAR2_52585766	296.585	333.381	0.373665
oar3_OAR2_52601096	48.1516	90.9792	0.596625
oar3_OAR2_52601327	48.1516	90.9792	0.596625
oar3_OAR2_52602161	48.1516	90.9792	0.596625
oar3_OAR2_52603556	36.2692	94.7242	0.7018
oar3_OAR2_52603918	36.2692	94.7242	0.7018
oar3_OAR2_52605154	48.1516	90.9792	0.596625
oar3_OAR2_52609256	20.0988	92.7601	0.828462
oar3_OAR2_52636020	-94.2255	121.606	0.438433
oar3_OAR2_52915018	-166.966	84.1176	0.0471539
s12424.1	-31.7971	95.2744	0.738574
oar3_OAR2_53724642	343.441	276.496	0.214193
oar3_OAR2_53918303	136.839	130.772	0.29538
oar3_OAR2_54683693	56.8352	84.0501	0.49891
oar3_OAR2_55321039	301.172	446.78	0.500252
oar3_OAR2_55355447	110.34	131.303	0.400716
oar3_OAR2_55803272	65.5889	150.35	0.662661
oar3_OAR2_55942087	34.3403	370.763	0.926205
oar3_OAR2_56405686	196.345	196.405	0.317459
oar3_OAR2_56876455	407.307	310.455	0.189531
oar3_OAR2_56960717	636.113	314.165	0.0428905
oar3_OAR2_56962401	636.113	314.165	0.0428905
oar3_OAR2_56989419	-113.777	187.349	0.543654
oar3_OAR2_56989503	-113.777	187.349	0.543654
oar3_OAR2_57136096	45.6239	99.9643	0.648101
oar3_OAR2_57726826	14.6348	75.509	0.846321
OAR2_62317193.1	129.922	224.506	0.562791
oar3_OAR2_57940884	129.922	224.506	0.562791
oar3_OAR2_58104010	19.0741	81.012	0.813861
s43380.1	-32.6272	102.933	0.751262
oar3_OAR2_59344165	-214.777	191.254	0.26144
OAR2_64205589.1	20.6808	82.4395	0.801922
oar3_OAR2_59856298	79.4257	113.792	0.485182
oar3_OAR2_60297847	18.0663	85.6568	0.832954
oar3_OAR2_61372756	-147.342	263.336	0.575806
oar3_OAR2_61516212	78.4939	140.037	0.575122
oar3_OAR2_61650643	81.0554	119.194	0.496487
OAR2_66195373.1	198.518	132.332	0.133575
OAR2_66485626.1	6.69267	154.49	0.965446
oar3_OAR2_62025075	-2.67636	154.455	0.986175
oar3_OAR2_62036704	-2.67636	154.455	0.986175
oar3_OAR2_63249648	93.4273	150.758	0.535444
OAR2_69370595.1	-39.2995	86.5385	0.649737
oar3_OAR2_65185556	118.52	124.632	0.341623
oar3_OAR2_65644875	67.325	86.0329	0.433891
oar3_OAR2_65820518	-10.3613	82.1209	0.899596
oar3_OAR2_66167626	259.587	333.807	0.436772
oar3_OAR2_66518893	66.8584	375.134	0.858546
oar3_OAR2_67188631	-5.01022	114.075	0.964968
oar3_OAR2_67348104	-22.14	337.54	0.947703
oar3_OAR2_67367120	-22.14	337.54	0.947703
oar3_OAR2_67404077	186.041	76.574	0.0151171
oar3_OAR2_67893743	41.5149	79.7455	0.602651
oar3_OAR2_68119796	-106.777	78.7371	0.175061
oar3_OAR2_68330824	34.402	136.102	0.800449
oar3_OAR2_68591441	129.39	117.236	0.269735
oar3_OAR2_68600569	129.39	117.236	0.269735
oar3_OAR2_68850552	-77.9653	283.124	0.783028
oar3_OAR2_69194444	-61.5386	102.463	0.548109
oar3_OAR2_69420235	74.95	87.1058	0.389542
oar3_OAR2_69709695	-16.266	224.829	0.942325
oar3_OAR2_70883752	-208.339	188.781	0.269766
oar3_OAR2_70883895	3.33722	79.9659	0.966712
oar3_OAR2_71028384	-39.7825	76.2334	0.601774
oar3_OAR2_72096946	-13.7937	84.4423	0.870243
oar3_OAR2_72418109	74.3312	111.46	0.504843
oar3_OAR2_73202030	489.776	391.853	0.211338
oar3_OAR2_73520826	-125.822	149.497	0.399991
oar3_OAR2_74015741	-113.192	87.113	0.193816
oar3_OAR2_74128316	277.084	NA	NA
oar3_OAR2_74217134	-98.3781	93.7463	0.29399
OAR2_79499240.1	-5.64983	139.166	0.967617
oar3_OAR2_74625942	265.849	193.619	0.169736
oar3_OAR2_74812631	91.1441	379.244	0.810074
oar3_OAR2_75155143	-260.719	229.236	0.255397
oar3_OAR2_75174180	-394.701	293.41	0.178555
oar3_OAR2_75619893	-180.345	113.307	0.111464
s46023.1	-211.015	242.666	0.384534
oar3_OAR2_76265306	6.66633	128.507	0.958628
oar3_OAR2_76594482	-28.1708	94.2938	0.765126
oar3_OAR2_77081164	-91.5673	102.422	0.371312
oar3_OAR2_77088137	-91.5673	102.422	0.371312
oar3_OAR2_77158530	149.665	101.647	0.140913
oar3_OAR2_77906167	18.4674	89.9891	0.837402
oar3_OAR2_78152041	-2.76059	104.254	0.978875
oar3_OAR2_78847653	-78.1167	82.0532	0.341085
oar3_OAR2_80807869	-37.8249	107.834	0.725762
oar3_OAR2_81804180	63.0795	83.0867	0.447732
oar3_OAR2_82640544	45.6513	86.5353	0.597815
oar3_OAR2_82654373	43.3493	86.3748	0.615756
oar3_OAR2_85292879	82.0841	123.893	0.507625
oar3_OAR2_85310548	-29.2074	82.5946	0.723621
oar3_OAR2_85540983	13.7831	120.298	0.908783
oar3_OAR2_85724137	-0.824849	83.4586	0.992114
oar3_OAR2_85911420	-220.948	160.758	0.169312
oar3_OAR2_86125552	-313.73	180.735	0.08259
oar3_OAR2_87046474	126.535	86.2529	0.142369
oar3_OAR2_87143819	1.51392	78.2855	0.984571
oar3_OAR2_87734413	27.3299	81.3326	0.736851
s35257.1	-92.6448	96.5804	0.337433
oar3_OAR2_89843175	-28.9813	87.0698	0.739246
oar3_OAR2_90749041	-170.894	102.009	0.0938784
OAR2_99060329.1	-104.579	231.786	0.651855
oar3_OAR2_92248708	-164.765	105.797	0.119384
oar3_OAR2_92753809	30.2371	138.462	0.827134
oar3_OAR2_93046285	-109.052	105.651	0.301979
oar3_OAR2_93387613	-291.908	204.699	0.153858
oar3_OAR2_93399654	31.8432	77.0409	0.679367
oar3_OAR2_93528012	407.564	377.828	0.280721
oar3_OAR2_93543018	407.564	377.828	0.280721
oar3_OAR2_93991173	-54.3627	79.7568	0.495488
oar3_OAR2_94068302	-0.635244	83.1663	0.993906
oar3_OAR2_94163297	92.7174	349.105	0.790558
oar3_OAR2_94173842	-2.71616	101.993	0.978754
oar3_OAR2_94814596	107.925	84.4714	0.201374
oar3_OAR2_94894613	-31.423	82.0181	0.701629
oar3_OAR2_95272052	66.487	268.203	0.804213
oar3_OAR2_95494266	144.452	79.9382	0.0707549
oar3_OAR2_95731017	324.451	311.415	0.297477
oar3_OAR2_97822290	109.831	148.679	0.46008
oar3_OAR2_97866676	-118.449	166.265	0.476209
oar3_OAR2_97998479	-51.2521	74.9689	0.4942
oar3_OAR2_98388569	104.766	111.614	0.347913
oar3_OAR2_98483209	-114.099	84.2433	0.175608
oar3_OAR2_98644846	6.15039	125.796	0.961005
oar3_OAR2_98645093	6.15039	125.796	0.961005
oar3_OAR2_98740515	364.914	190.141	0.0549612
oar3_OAR2_98825791	52.9225	83.8511	0.527943
oar3_OAR2_100413386	-164.066	100.781	0.103537
oar3_OAR2_100985663	-42.5367	78.3546	0.587217
oar3_OAR2_101573046	74.6497	85.8196	0.384385
oar3_OAR2_101823145	6.13926	85.6207	0.942838
oar3_OAR2_101850460	-32.1961	90.8125	0.722939
OAR2_109680498.1	-168.21	253.919	0.50768
oar3_OAR2_102393643	77.6545	79.1898	0.326784
oar3_OAR2_105366909	59.0138	121.541	0.627289
oar3_OAR2_105376487	63.4226	296.472	0.830606
oar3_OAR2_105593780	-18.9355	132.401	0.886277
oar3_OAR2_105620442	268.198	181.629	0.139776
oar3_OAR2_105975106	-40.756	116.641	0.726777
oar3_OAR2_106143617	120.545	310.323	0.697683
oar3_OAR2_106202093	-27.1149	110.356	0.805912
oar3_OAR2_106297310	284.869	216.572	0.18839
oar3_OAR2_106370495	52.899	102.694	0.606476
oar3_OAR2_106489455	-44.2949	85.6264	0.604944
oar3_OAR2_107611039	89.584	375.11	0.811245
oar3_OAR2_107611107	89.584	375.11	0.811245
oar3_OAR2_107880547	-44.9063	83.6578	0.591416
oar3_OAR2_107968374	-83.3616	96.1915	0.386149
oar3_OAR2_108596062	-230.557	263.184	0.381014
oar3_OAR2_108627476	-107.111	80.2963	0.182219
oar3_OAR2_108832619	-153.576	332.232	0.643898
oar3_OAR2_109222272	-159.231	101.965	0.118379
oar3_OAR2_109474869	-67.3855	132.876	0.612062
oar3_OAR2_109490178	-122.642	99.1482	0.216104
oar3_OAR2_109494358	36.5745	384.426	0.924203
oar3_OAR2_109524173	-23.9271	139.978	0.864275
oar3_OAR2_109528629	-23.9271	139.978	0.864275
oar3_OAR2_110178644	0.105333	167.627	0.999499
oar3_OAR2_110526045	-184.015	123.347	0.135738
oar3_OAR2_113126136	21.3115	89.4062	0.811596
oar3_OAR2_113851748	-41.9732	104.901	0.689067
oar3_OAR2_113948977	-41.9732	104.901	0.689067
oar3_OAR2_114582444	30.2957	83.6136	0.717106
oar3_OAR2_115403813	2.7832	77.6301	0.9714
oar3_OAR2_116051802	-382.545	169.64	0.0241309
oar3_OAR2_116065976	-382.545	169.64	0.0241309
oar3_OAR2_116762508	229.09	218.735	0.294943
oar3_OAR2_117321520	130.883	267.051	0.624061
oar3_OAR2_117587536	-176.633	168.235	0.293756
oar3_OAR2_118216230	-249.433	254.28	0.326624
oar3_OAR2_118346727	-54.3382	88.4021	0.538772
oar3_OAR2_118699791	328.826	126.478	0.00932627
oar3_OAR2_118739178	55.1603	338.541	0.870569
oar3_OAR2_118824631	273.615	105.606	0.00957242
oar3_OAR2_119187032	143.72	74.8029	0.0546913
oar3_OAR2_119193619	143.72	74.8029	0.0546913
OAR2_127499743.1	664.314	186.724	0.000374072
oar3_OAR2_119695537	198.709	93.0471	0.0327144
oar3_OAR2_120059106	-219.331	149.611	0.142645
oar3_OAR2_120208247	-35.3704	187.647	0.850489
oar3_OAR2_120655730	64.6317	80.3041	0.420914
oar3_OAR2_122510429	-347.083	193.733	0.0732046
oar3_OAR2_122513459	-35.6522	96.5089	0.711816
OAR2_130852040_X.1	-182.138	136.618	0.182469
oar3_OAR2_123537879	-122.253	132.658	0.356756
oar3_OAR2_123538602	-95.2961	93.1395	0.306235
oar3_OAR2_123847199	-46.619	126.686	0.712881
oar3_OAR2_124945939	-261.217	190.747	0.170863
oar3_OAR2_125303394	66.6849	97.4241	0.493672
OAR2_135206336.1	-120.235	94.8896	0.205119
oar3_OAR2_127211233	187.691	130.835	0.151412
OAR2_137718678.1	-77.6557	83.7786	0.35397
oar3_OAR2_130254778	-71.3078	114.626	0.533883
oar3_OAR2_130257655	-71.3078	114.626	0.533883
oar3_OAR2_130265224	-102.987	74.8046	0.168593
oar3_OAR2_131409216	352.673	301.088	0.241467
OAR2_140515187.1	-105.801	96.7928	0.274364
oar3_OAR2_132158656	-94.5247	122.649	0.440889
oar3_OAR2_132173938	322.773	113.303	0.00438899
oar3_OAR2_132512943	112.078	77.1807	0.146459
oar3_OAR2_133157879	86.6128	268.772	0.74726
oar3_OAR2_133319822	-65.6866	79.5278	0.408828
oar3_OAR2_133359887	-95.4338	137.738	0.488395
oar3_OAR2_133648066	17.8828	78.773	0.820411
oar3_OAR2_134135503	74.6302	224.957	0.740076
oar3_OAR2_134520734	95.303	97.1884	0.32679
oar3_OAR2_135009300	40.6519	116.729	0.727646
oar3_OAR2_135271336	7.54844	136.627	0.95594
OAR2_143916009.1	42.853	82.6144	0.603962
oar3_OAR2_136387631	-50.0604	124.14	0.686759
oar3_OAR2_136538816	537.917	275.893	0.0512083
oar3_OAR2_136774904	-61.0899	226.325	0.787221
oar3_OAR2_138341981	24.5665	105.648	0.816125
oar3_OAR2_138343876	9.26244	104.355	0.929274
OAR2_147417007.1	47.1594	79.0748	0.550915
oar3_OAR2_139116515	-33.8594	78.7665	0.66729
oar3_OAR2_139585722	-14.2057	121.769	0.907129
oar3_OAR2_139592686	-81.4597	168.202	0.628175
oar3_OAR2_139929155	102.426	81.0124	0.206115
oar3_OAR2_141124903	-17.6307	100.08	0.860163
oar3_OAR2_141259051	-45.177	83.8537	0.590052
oar3_OAR2_141259789	-45.177	83.8537	0.590052
oar3_OAR2_141277495	-60.1175	84.5636	0.477137
oar3_OAR2_141890791	-134.274	367.575	0.71489
oar3_OAR2_141908752	45.0718	332.977	0.892327
oar3_OAR2_142174770	-64.0556	180.497	0.722676
oar3_OAR2_142315573	10.0948	79.5868	0.899067
oar3_OAR2_142477683	-65.4096	183.987	0.722206
oar3_OAR2_142849355	-33.9641	194.079	0.861079
oar3_OAR2_142945469	17.0633	107.893	0.874339
oar3_OAR2_143795078	-189.788	292.219	0.516032
oar3_OAR2_144674141	-93.5139	310.947	0.763613
oar3_OAR2_144800022	352.858	163.421	0.0308354
oar3_OAR2_144801700	352.858	163.421	0.0308354
OAR2_153768555.1	-70.0442	201.211	0.727755
oar3_OAR2_144814589	779.903	344.482	0.0235748
oar3_OAR2_145572435	224.416	331.6	0.498553
oar3_OAR2_145774098	-48.4802	84.1448	0.564513
oar3_OAR2_146556209	109.296	198.768	0.582413
oar3_OAR2_147454065	-88.0962	279.985	0.75303
oar3_OAR2_147670480	195.331	166.227	0.239961
oar3_OAR2_148529592	-48.5988	76.0055	0.522555
oar3_OAR2_148843525	-62.1772	105.015	0.553796
oar3_OAR2_148861079	277.084	NA	NA
oar3_OAR2_149670565	46.989	78.0912	0.547361
oar3_OAR2_150538489	-154.534	176.355	0.380885
s47101.1	529.835	207.259	0.0105764
oar3_OAR2_152395160	119.604	256.902	0.641528
oar3_OAR2_152408466	119.604	256.902	0.641528
oar3_OAR2_152454119	-54.7635	176.1	0.755817
oar3_OAR2_152506883	16.9039	76.8487	0.8259
oar3_OAR2_152590687	-38.1246	181.85	0.833942
oar3_OAR2_152848894	-258.521	310.036	0.404371
oar3_OAR2_153522102	-252.037	132.5	0.0571503
oar3_OAR2_153578259	-35.0222	174.988	0.841371
s46921.1	-106.147	120.675	0.379072
oar3_OAR2_154248329	-16.9047	168.4	0.920039
oar3_OAR2_154298306	11.5582	93.2689	0.901376
oar3_OAR2_154418275	-140.771	92.9856	0.13005
oar3_OAR2_154419851	-140.771	92.9856	0.13005
oar3_OAR2_154877173	-75.7399	99.401	0.446082
oar3_OAR2_155171464	-135.45	200.904	0.500182
OAR2_165447267.1	-131.202	119.218	0.271105
oar3_OAR2_156752727	-146.533	172.959	0.396876
oar3_OAR2_157483328	536.497	224.466	0.0168436
oar3_OAR2_158171735	-154.746	343.052	0.651929
oar3_OAR2_158206158	19.7709	83.2147	0.8122
oar3_OAR2_158420116	21.9311	85.9302	0.798553
oar3_OAR2_158513460	-284.732	229.857	0.215443
oar3_OAR2_158795643	123.272	81.5209	0.130494
OAR2_168857414.1	-50.5463	81.7598	0.536425
oar3_OAR2_159411632	251.636	133.274	0.0590119
oar3_OAR2_159722914	124.001	131.095	0.344204
oar3_OAR2_160555626	26.2531	307.521	0.931967
oar3_OAR2_160561994	334.079	194.562	0.0859637
s72026.1	-37.9467	94.1385	0.686879
oar3_OAR2_161742126	25.5501	88.0866	0.771773
oar3_OAR2_162996303	-74.6085	140.099	0.594352
oar3_OAR2_163458925	277.084	NA	NA
oar3_OAR2_164099776	117.56	200.12	0.556903
oar3_OAR2_164883446	-141.434	115.25	0.21975
oar3_OAR2_165751474	9.3168	98.4151	0.924578
oar3_OAR2_166157648	-17.5309	86.4168	0.839241
oar3_OAR2_166158282	-82.7789	85.9303	0.335384
oar3_OAR2_166200633	-19.2141	86.4606	0.824135
oar3_OAR2_166208023	-15.43	86.3401	0.858164
OAR2_175895340.1	-6.04059	87.9462	0.94524
oar3_OAR2_166236436	7.4593	88.8049	0.933059
oar3_OAR2_166250267	48.0734	107.856	0.6558
oar3_OAR2_166252959	35.7478	107.577	0.739663
oar3_OAR2_166254615	35.7478	107.577	0.739663
oar3_OAR2_168185084	42.171	338.151	0.900753
oar3_OAR2_168760739	111.628	76.5695	0.144879
oar3_OAR2_169278216	-58.8328	110.28	0.593697
oar3_OAR2_169765238	-127.437	100.129	0.203117
oar3_OAR2_169831716	-45.78	79.6895	0.565643
oar3_OAR2_170197755	-201.101	93.3104	0.0311476
oar3_OAR2_170212475	128.613	288.866	0.65615
OAR2_180261787.1	128.613	288.866	0.65615
OAR2_180267656.1	128.613	288.866	0.65615
oar3_OAR2_170493881	-141.299	76.9279	0.0662437
s19627.1	-3.81975	75.5957	0.959701
oar3_OAR2_171864386	52.8619	125.888	0.674549
oar3_OAR2_172303070	-69.5577	139.009	0.616805
oar3_OAR2_172843026	129.31	111.086	0.244404
oar3_OAR2_173203315	3.61404	131.097	0.978007
oar3_OAR2_174194705	-25.2319	136.679	0.853537
oar3_OAR2_174227824	51.5679	86.0505	0.548989
oar3_OAR2_175019987	86.6311	81.5731	0.288233
oar3_OAR2_176556906	-13.2728	79.9265	0.868107
oar3_OAR2_177155788	228.329	159.289	0.151736
oar3_OAR2_177589331	-128.362	220.306	0.560127
oar3_OAR2_177591678	-140.326	199.461	0.481726
oar3_OAR2_178645468	105.021	74.5396	0.158858
oar3_OAR2_179119499	52.1488	260.175	0.841138
oar3_OAR2_179332991	146.997	127.597	0.249306
oar3_OAR2_179671698	-24.4035	194.36	0.900081
oar3_OAR2_179708667	-24.4035	194.36	0.900081
oar3_OAR2_179710683	-190.16	188.977	0.314289
oar3_OAR2_179720122	-125.494	180.14	0.486022
oar3_OAR2_180500391	463.467	284.079	0.102791
oar3_OAR2_180904504	-280.902	269.446	0.297173
oar3_OAR2_181721661	29.6222	82.9305	0.720948
oar3_OAR2_182824846	-21.7762	87.5063	0.803475
oar3_OAR2_183136068	24.1415	180.996	0.893892
oar3_OAR2_183254401	50.4247	81.8284	0.537746
oar3_OAR2_183426759	277.084	NA	NA
oar3_OAR2_183517474	-153.825	269.997	0.568862
oar3_OAR2_183922581	88.9963	227	0.695018
oar3_OAR2_184499470	-66.8313	220.234	0.761543
oar3_OAR2_184549659	-126.632	162.437	0.435638
oar3_OAR2_184562991	0.857932	76.0096	0.990994
oar3_OAR2_186136257	-462.192	281.451	0.100554
oar3_OAR2_187685935	-83.3983	98.4802	0.397077
oar3_OAR2_188079613	74.4664	84.0559	0.375663
oar3_OAR2_188220514	4.7571	134.19	0.971721
oar3_OAR2_188656563	191.289	136.901	0.162329
oar3_OAR2_188737150	228.962	137.573	0.0960546
oar3_OAR2_188778247	-88.6085	309.907	0.77494
oar3_OAR2_188810423	91.0039	82.5773	0.270442
oar3_OAR2_189094883	-89.3212	73.0988	0.221736
oar3_OAR2_189123892	90.7204	82.1855	0.269659
oar3_OAR2_189132327	52.5812	87.5619	0.548171
oar3_OAR2_189275789	605.992	372.875	0.104122
oar3_OAR2_189684954	-64.7577	123.518	0.600087
oar3_OAR2_189773191	441.602	282.214	0.117635
oar3_OAR2_190267109	48.1786	111.915	0.666838
oar3_OAR2_190965464	-501.164	289.766	0.0837112
s09135.1	157.76	116.771	0.176691
oar3_OAR2_194066756	37.3247	136.959	0.785219
oar3_OAR2_195529009	558.538	242.132	0.0210688
OAR2_207636171.1	-74.463	79.9773	0.351827
oar3_OAR2_196127213	-74.463	79.9773	0.351827
oar3_OAR2_196409044	-198.957	377.003	0.597685
oar3_OAR2_196938182	243.49	123.892	0.0493752
s53364.1	191.79	90.2244	0.0335287
OAR2_210373144.1	48.5288	76.1452	0.523917
oar3_OAR2_199173587	69.3437	191.629	0.717454
oar3_OAR2_199362532	119.939	250.477	0.63205
oar3_OAR2_199626105	200.119	187.034	0.284636
oar3_OAR2_200383623	-168.979	78.9657	0.032362
oar3_OAR2_201477703	-136.466	77.0669	0.076603
oar3_OAR2_201815665	259.418	157.109	0.0986981
oar3_OAR2_201973466	78.341	83.6858	0.349205
oar3_OAR2_202443534	-51.3038	185.563	0.782182
oar3_OAR2_202443621	-51.3038	185.563	0.782182
oar3_OAR2_202455692	-139.761	164.135	0.394492
oar3_OAR2_202455952	-107.679	163.008	0.508888
oar3_OAR2_202895658	243.192	159.581	0.127523
oar3_OAR2_203070394	-93.0336	187.326	0.619442
OAR2_215241186.1	213.212	254.5	0.402161
oar3_OAR2_203862908	155.877	74.3863	0.0361256
oar3_OAR2_204891606	42.913	80.6998	0.594891
oar3_OAR2_206055976	86.3734	84.8372	0.308627
oar3_OAR2_207538379	-380.576	213.664	0.0748818
oar3_OAR2_207588102	74.3759	87.5728	0.395713
oar3_OAR2_208903269	86.8854	106.392	0.414128
oar3_OAR2_209328872	233.903	285.557	0.412723
oar3_OAR2_209348333	-128.595	91.3311	0.159127
oar3_OAR2_209414745	45.5079	79.8629	0.568796
oar3_OAR2_209725114	-71.1744	80.3799	0.3759
oar3_OAR2_210341453	-53.6027	86.3914	0.534953
oar3_OAR2_210895353	47.3844	119.413	0.691506
s01552.1	-61.256	82.7421	0.459103
oar3_OAR2_212160250	-104.711	109.324	0.338163
OAR2_224687649.1	177.784	102.91	0.0840661
oar3_OAR2_212856501	-142.961	83.2826	0.0860568
oar3_OAR2_213917231	105.939	108.71	0.329802
oar3_OAR2_214226052	90.0175	85.9758	0.295095
oar3_OAR2_216309890	50.1401	331.737	0.879862
oar3_OAR2_217453051	-71.1302	161.946	0.6605
oar3_OAR2_217492882	-358.122	184.642	0.0524353
oar3_OAR2_217747120	264.656	272.864	0.332088
oar3_OAR2_218485210	70.9877	122.173	0.561212
oar3_OAR2_219594275	28.5816	212.101	0.892806
oar3_OAR2_219820510	62.8887	262.45	0.810623
oar3_OAR2_220110100	379.566	284.541	0.182218
oar3_OAR2_220161372	190.5	177.802	0.283982
oar3_OAR2_220286822	-64.6195	89.4983	0.470282
OAR2_233763666.1	-84.4431	81.123	0.29791
OAR2_233792622.1	-145.562	78.4914	0.063668
oar3_OAR2_221190781	-11.4563	147.712	0.938179
OAR2_233917337.1	-12.3487	132.881	0.925959
OAR2_234213654.1	84.059	85.8573	0.327553
oar3_OAR2_221774544	254.213	275.658	0.356421
oar3_OAR2_221873668	379.324	241.012	0.115515
oar3_OAR2_224382186	-28.3207	98.1511	0.772932
oar3_OAR2_224495458	-28.3207	98.1511	0.772932
oar3_OAR2_224496559	-28.3207	98.1511	0.772932
oar3_OAR2_224732792	151.641	141.259	0.28305
oar3_OAR2_224895247	306.456	253.454	0.226618
oar3_OAR2_224999028	68.3372	115.43	0.553837
oar3_OAR2_225171812	-104.774	111.382	0.346874
oar3_OAR2_225309581	-99.1569	82.8659	0.231465
oar3_OAR2_225670335	-42.5103	93.5963	0.649694
oar3_OAR2_225909007	-23.2792	83.9209	0.781477
oar3_OAR2_225910670	22.5617	81.7304	0.78251
oar3_OAR2_226273328	243.758	266.052	0.35956
oar3_OAR2_226545476	105.72	81.7429	0.1959
oar3_OAR2_226585562	-54.1041	81.8296	0.508497
oar3_OAR2_226825863	-132.434	120.638	0.272301
oar3_OAR2_227713473	46.7877	108.14	0.665263
oar3_OAR2_229141320	-136.736	185.29	0.460542
oar3_OAR2_229220109	-178.394	157.746	0.258101
oar3_OAR2_229305158	459.57	208.73	0.0276832
oar3_OAR2_229600563	152.09	160.045	0.34196
oar3_OAR2_231531035	33.0839	79.9663	0.679077
oar3_OAR2_231539625	33.0839	79.9663	0.679077
oar3_OAR2_231910419	92.373	101.977	0.365033
oar3_OAR2_231926097	307.143	261.649	0.240446
oar3_OAR2_231979676	113.223	92.5004	0.220941
oar3_OAR2_232797321	-38.9782	170.73	0.819411
oar3_OAR2_233228527	-151.55	84.4634	0.0727699
oar3_OAR2_233938827	277.084	NA	NA
oar3_OAR2_234248716	-1.55201	90.1582	0.986266
OAR2_248370850.1	96.1884	145.8	0.509428
oar3_OAR2_235450514	-453.03	307.683	0.140915
oar3_OAR2_235640121	277.084	NA	NA
oar3_OAR2_236139124	-19.3453	114.061	0.86532
oar3_OAR2_236215374	85.1313	181.832	0.639651
oar3_OAR2_236720734	-181.191	129.103	0.160481
oar3_OAR2_237911785	-99.8341	121.738	0.412176
oar3_OAR2_240793093	302.464	159.981	0.058675
oar3_OAR2_241138457	-1046.8	402.908	0.00937396
oar3_OAR2_241297272	339.043	133.985	0.0113917
oar3_OAR2_241365648	-2.00291	114.387	0.98603
oar3_OAR2_241375331	-5.66832	135.478	0.966627
oar3_OAR2_241944532	68.1839	90.0069	0.448726
oar3_OAR2_242723012	-243.487	303.781	0.42283
oar3_OAR2_242813257	-47.1941	119.544	0.693003
oar3_OAR2_243283028	183.604	143.262	0.199985
s21402.1	-4.21028	94.7903	0.964572
s10664.1	-154.145	95.6048	0.106894
oar3_OAR2_244607475	24.2132	107.377	0.821592
oar3_OAR2_245786206	137.894	102.507	0.178559
oar3_OAR2_245845429	-85.7051	112.923	0.447873
oar3_OAR2_246141783	252.619	95.2293	0.00798404
oar3_OAR2_246288895	-103.905	77.4564	0.179769
oar3_OAR2_246967048	23.7406	87.7101	0.786644
oar3_OAR2_247280741	15.7513	333.851	0.962369
oar3_OAR2_247412431	164.884	266.048	0.53542
oar3_OAR2_247479578	-10.5068	143.51	0.941637
oar3_OAR2_248485648	87.8329	172.84	0.611331
oar3_OAR2_248604002	-424.928	186.122	0.0224266
oar3_OAR2_248881384	277.084	NA	NA
oar3_OAR2_248967032	-71.8097	91.0834	0.430466
oar3_OAR3_1194831	-34.6161	133.337	0.795161
oar3_OAR3_2633828	47.8857	101.259	0.636281
oar3_OAR3_2634118	47.8857	101.259	0.636281
oar3_OAR3_6720021	-27.2452	241.922	0.910332
oar3_OAR3_7144622	-294.026	149.661	0.0494586
oar3_OAR3_7284988	194.917	86.3353	0.0239658
oar3_OAR3_7576730	-96.44	107.679	0.370454
oar3_OAR3_7589931	-184.734	125.36	0.140582
oar3_OAR3_8273457	-303.371	350.25	0.386406
oar3_OAR3_8626684	-127.773	83.3227	0.12516
oar3_OAR3_9502162	-163.666	128.816	0.203893
oar3_OAR3_9629288	-33.7633	269.3	0.900227
oar3_OAR3_10594302	-105.52	73.2966	0.149973
OAR3_11124571.1	-105.52	73.2966	0.149973
oar3_OAR3_11234461	-179.144	124.755	0.151011
oar3_OAR3_11492072	48.665	109.077	0.655487
oar3_OAR3_11845594	-327.794	307.059	0.285733
oar3_OAR3_12330259	-140.382	96.8755	0.147311
oar3_OAR3_12384267	113.052	222.931	0.612072
oar3_OAR3_12759953	-204.67	204.325	0.316493
oar3_OAR3_13343273	149.66	188.026	0.42606
oar3_OAR3_14227770	59.0573	126.75	0.641262
oar3_OAR3_14356597	221.777	126.141	0.0787201
oar3_OAR3_14519918	485.626	181.067	0.00731771
oar3_OAR3_14533358	501.428	164.414	0.00229006
oar3_OAR3_14534077	501.428	164.414	0.00229006
oar3_OAR3_14629762	512.802	371.339	0.167293
oar3_OAR3_14668353	87.5268	154.796	0.571779
oar3_OAR3_14977730	-13.5278	88.8717	0.879016
oar3_OAR3_15026298	-4.179	154.504	0.978422
oar3_OAR3_15795176	277.229	76.7831	0.000305555
oar3_OAR3_15804927	-122.163	110.718	0.269866
oar3_OAR3_16833521	115.756	180.242	0.520726
oar3_OAR3_17512070	-34.7887	144.12	0.809255
oar3_OAR3_17614012	-183.395	185.936	0.323969
oar3_OAR3_18109758	41.9841	75.5077	0.578195
oar3_OAR3_19464036	118.956	220.625	0.589765
oar3_OAR3_19698124	-21.458	77.365	0.781504
oar3_OAR3_20658157	-100.289	240.24	0.676347
oar3_OAR3_21779337	90.7702	425.799	0.83119
oar3_OAR3_22790702	1049.09	424.756	0.0135165
oar3_OAR3_23264592	-147.67	167.016	0.376607
OAR3_25248302.1	-215.725	229.251	0.346706
oar3_OAR3_23593401	-30.0697	87.7679	0.731896
oar3_OAR3_24019481	186.371	220.813	0.398658
oar3_OAR3_25324321	-19.7402	180.594	0.912959
oar3_OAR3_25799289	83.9363	108.868	0.440711
oar3_OAR3_26285518	248.331	429.524	0.56316
oar3_OAR3_26631626	18.8615	162.727	0.907725
oar3_OAR3_27063828	-400.74	286.174	0.161411
oar3_OAR3_27233004	32.6593	87.0561	0.707547
oar3_OAR3_27583471	-37.436	117.491	0.750009
oar3_OAR3_28147971	-131.266	166.217	0.429688
oar3_OAR3_28209929	59.9018	88.7392	0.499656
oar3_OAR3_28672423	83.2168	84.178	0.322868
oar3_OAR3_28676362	126.141	147.327	0.391888
oar3_OAR3_28680922	65.9934	140.235	0.637932
oar3_OAR3_28681015	65.9934	140.235	0.637932
oar3_OAR3_28795326	-60.1274	78.1446	0.441634
oar3_OAR3_29787100	-43.8616	151.285	0.771872
oar3_OAR3_30192997	149.958	135.616	0.268832
oar3_OAR3_30246722	-17.8356	91.435	0.845343
oar3_OAR3_30515445	77.1541	156.337	0.621651
oar3_OAR3_30894758	410.254	342.336	0.230763
oar3_OAR3_31017816	9.84445	97.3415	0.919445
oar3_OAR3_32278095	8.9069	86.2342	0.917735
oar3_OAR3_32411841	191.206	243.868	0.433008
oar3_OAR3_33501366	-59.8944	76.4136	0.433147
oar3_OAR3_33521986	50.3163	79.2555	0.525518
oar3_OAR3_33766389	-73.0569	134.209	0.586198
oar3_OAR3_33790957	-177.2	130.458	0.174373
oar3_OAR3_34477419	25.1207	186.066	0.892604
oar3_OAR3_35015612	92.4948	225.254	0.681347
oar3_OAR3_35025236	27.6814	318.389	0.930718
oar3_OAR3_35688762	96.6787	84.022	0.249883
oar3_OAR3_36205043	-28.3505	286.033	0.921046
oar3_OAR3_36301927	141.634	368.945	0.701061
oar3_OAR3_37263161	-222.577	262.401	0.396309
oar3_OAR3_37419076	294.103	145.053	0.0426057
oar3_OAR3_37598348	9.83059	92.8721	0.915701
oar3_OAR3_37990069	-289.241	267.859	0.280219
oar3_OAR3_38817005	275.879	129.123	0.0326342
oar3_OAR3_38859483	188.625	76.1273	0.0132213
oar3_OAR3_39541595	-547.366	309.507	0.0769756
oar3_OAR3_39562821	-166.778	78.4406	0.0334895
oar3_OAR3_41683805	-444.944	217.048	0.0403662
oar3_OAR3_43187920	-7.42226	77.4627	0.923666
oar3_OAR3_43612762	-224.665	81.4046	0.00578261
oar3_OAR3_45852330	216.106	90.4377	0.0168688
OAR3_49139982.1	78.7577	119.9	0.51127
oar3_OAR3_47587887	39.3398	84.3736	0.641031
oar3_OAR3_47860017	-17.5702	143.009	0.902217
oar3_OAR3_51026498	-221.227	90.8425	0.0148804
oar3_OAR3_51055743	-181.366	143.552	0.206441
oar3_OAR3_51858945	-61.9311	90.9212	0.495776
oar3_OAR3_52016429	-623.62	267.509	0.0197424
oar3_OAR3_52674235	109.79	82.5874	0.183724
oar3_OAR3_52991358	-392.571	369.242	0.2877
oar3_OAR3_54316198	3.97964	78.1377	0.95938
oar3_OAR3_54362242	-107.052	81.166	0.187194
oar3_OAR3_54684885	-14.5395	92.6026	0.875237
oar3_OAR3_54778756	229.815	227.879	0.313217
oar3_OAR3_54968316	80.0895	133.678	0.54909
OAR3_58569187.1	-157.851	221.414	0.475894
oar3_OAR3_55457928	-9.07348	78.8099	0.908341
oar3_OAR3_55492757	-71.6073	172.18	0.677493
oar3_OAR3_55580533	-48.7146	150.027	0.745404
oar3_OAR3_56031411	-29.3928	77.1162	0.703092
oar3_OAR3_57077474	411.811	287.008	0.151333
oar3_OAR3_57879730	-21.532	85.8067	0.801863
oar3_OAR3_58443203	179.873	120.032	0.133991
oar3_OAR3_58761283	-333.012	143.623	0.020414
oar3_OAR3_59308079	42.37	76.1483	0.577928
oar3_OAR3_59325002	163.357	209.705	0.435989
oar3_OAR3_59342825	-27.3644	78.8919	0.728697
oar3_OAR3_59347261	-1.44444	78.5403	0.985327
oar3_OAR3_59347413	-1.44444	78.5403	0.985327
oar3_OAR3_59465391	-258.738	116.48	0.0263306
oar3_OAR3_60135394	49.3353	252.527	0.845106
oar3_OAR3_60924429	116.23	146.897	0.428806
oar3_OAR3_61338622	66.4978	140.449	0.635882
oar3_OAR3_61620304	335.865	338.539	0.321148
oar3_OAR3_62300194	-17.7203	80.2846	0.825312
oar3_OAR3_62596963	71.5827	89.5185	0.423918
s10073.1	233.77	210.628	0.267055
oar3_OAR3_64830955	193.442	169.025	0.252434
oar3_OAR3_65105912	-310.517	211.131	0.141364
oar3_OAR3_65554141	132.478	172.33	0.442044
oar3_OAR3_66533755	148.775	151.214	0.325181
oar3_OAR3_68301598	-89.3356	303.72	0.768652
oar3_OAR3_68828181	62.4472	98.3555	0.525485
oar3_OAR3_68893688	167.212	115.621	0.148118
oar3_OAR3_69489292	34.5291	77.3753	0.655413
oar3_OAR3_69602440	61.428	112.037	0.583497
oar3_OAR3_69770696	58.7651	176.796	0.739596
OAR3_74156228.1	-83.6911	78.7721	0.288033
oar3_OAR3_70932507	44.4481	165.647	0.788445
oar3_OAR3_72090270	-120.099	125.055	0.336869
oar3_OAR3_73819070	-89.9857	132.907	0.49837
OAR3_79590268.1	173.634	78.5009	0.0269758
oar3_OAR3_75717054	50.4198	82.0746	0.539006
OAR3_80182465_X.1	93.6745	148.474	0.528095
oar3_OAR3_76054532	245.136	134.622	0.0686193
oar3_OAR3_76969249	110.793	245.77	0.652134
oar3_OAR3_78022536	-569.1	264.47	0.031409
s26507.1	1.08021	75.9	0.988645
oar3_OAR3_79134396	207.727	143.763	0.148478
oar3_OAR3_80437548	80.0605	145.468	0.58207
oar3_OAR3_81205845	134.898	114.568	0.239017
oar3_OAR3_82415649	-119.297	104.285	0.252646
oar3_OAR3_82726274	-205.756	97.8479	0.0354824
oar3_OAR3_83258149	-12.7867	271.737	0.962469
oar3_OAR3_83376654	7.83694	108.632	0.942489
oar3_OAR3_83888031	-109.034	370.102	0.768296
oar3_OAR3_83911583	-63.2879	82.2774	0.441774
oar3_OAR3_84181415	31.401	267.331	0.906495
oar3_OAR3_84200589	53.8263	142.984	0.706581
oar3_OAR3_84364350	-37.8803	97.5223	0.6977
oar3_OAR3_85239123	-75.1802	84.9788	0.376322
oar3_OAR3_85240285	-78.4809	84.0477	0.350424
OAR3_90233814.1	122.81	100.304	0.220813
oar3_OAR3_85320342	-164.538	163.171	0.313271
oar3_OAR3_85449080	-239.257	295.137	0.417559
oar3_OAR3_86054638	-78.1592	80.0554	0.328909
oar3_OAR3_86146585	5.95182	73.7944	0.935717
oar3_OAR3_87273667	-223.786	172.697	0.195035
oar3_OAR3_87381733	46.7477	73.2201	0.523178
oar3_OAR3_87952210	118.98	86.3108	0.168046
oar3_OAR3_88158540	-230.47	193.265	0.233063
oar3_OAR3_88420214	76.9008	78.2642	0.325815
oar3_OAR3_88462868	169.441	84.6266	0.0452607
oar3_OAR3_88895793	-35.04	111.944	0.754271
oar3_OAR3_89960096	-223.912	135.947	0.0995468
oar3_OAR3_90528297	-31.2148	75.0731	0.677562
oar3_OAR3_91191575	-32.6028	106.497	0.7595
oar3_OAR3_91247271	517.068	268.092	0.0537685
oar3_OAR3_91571895	-30.6757	87.2702	0.725212
oar3_OAR3_91574266	-34.1477	87.2741	0.695598
oar3_OAR3_91586079	-30.6757	87.2702	0.725212
oar3_OAR3_91589637	-30.6757	87.2702	0.725212
oar3_OAR3_92454498	67.0532	80.6695	0.405856
oar3_OAR3_93345621	-378.676	231.874	0.102445
oar3_OAR3_93471193	-118.88	94.9465	0.210544
oar3_OAR3_95399968	277.084	NA	NA
oar3_OAR3_95698833	55.1207	78.2102	0.48095
oar3_OAR3_98123099	-40.3595	213.572	0.850114
oar3_OAR3_98126933	39.4473	88.0789	0.654252
oar3_OAR3_98228729	-122.372	147.515	0.40679
oar3_OAR3_98292242	140.227	88.6112	0.113536
oar3_OAR3_99560441	-461.699	265.251	0.0817517
oar3_OAR3_100363133	35.547	77.4873	0.646416
oar3_OAR3_101279820	5.73818	285.513	0.983965
oar3_OAR3_101563998	-121.669	219.699	0.579718
oar3_OAR3_101608083	86.1611	224.866	0.701597
oar3_OAR3_101847207	-1.2414	113.739	0.991292
oar3_OAR3_102764573	59.3211	83.7268	0.47863
oar3_OAR3_102767450	3.51704	79.3382	0.964642
oar3_OAR3_102768926	3.51704	79.3382	0.964642
oar3_OAR3_102841258	-81.5971	94.1701	0.386224
oar3_OAR3_103344781	35.4621	239.945	0.882506
oar3_OAR3_103366372	174.893	116.327	0.13272
oar3_OAR3_103732866	-95.175	81.8225	0.244753
OAR3_111390099.1	65.9246	161.499	0.683123
oar3_OAR3_106197460	-158.602	84.7493	0.0612867
oar3_OAR3_107878648	-270.069	146.927	0.0660447
oar3_OAR3_108714118	7.7296	91.2773	0.932514
oar3_OAR3_109413446	-164.516	182.801	0.368134
oar3_OAR3_110293311	-28.8185	90.7337	0.750776
oar3_OAR3_110857562	36.9429	87.5026	0.672885
oar3_OAR3_111024455	-40.0353	84.289	0.634804
oar3_OAR3_111037134	-40.0353	84.289	0.634804
oar3_OAR3_111360572	277.084	NA	NA
oar3_OAR3_111625868	322.828	264.097	0.221562
oar3_OAR3_111745512	17.8662	84.8713	0.83327
oar3_OAR3_111869887	19.6323	85.5078	0.818405
oar3_OAR3_111870918	36.2443	85.2059	0.670565
oar3_OAR3_112152515	-107.503	95.3015	0.259309
oar3_OAR3_112253884	-223.423	106.786	0.0364164
oar3_OAR3_112761647	253.744	118.314	0.0319793
oar3_OAR3_115019104	75.1873	94.7588	0.42751
oar3_OAR3_115439876	126.846	249.296	0.610883
oar3_OAR3_116232246	52.1546	95.21	0.58384
oar3_OAR3_116430018	-3.63975	111.309	0.973914
OAR3_124197544.1	-142.826	209.433	0.495263
oar3_OAR3_116504036	114.577	131.123	0.382224
oar3_OAR3_116921607	21.0946	92.041	0.818724
OAR3_124716738.1	21.0946	92.041	0.818724
oar3_OAR3_116930534	21.0946	92.041	0.818724
oar3_OAR3_116933330	21.0946	92.041	0.818724
oar3_OAR3_116990719	27.3611	78.9465	0.728908
oar3_OAR3_117269241	58.2432	83.1213	0.48349
oar3_OAR3_117886389	-45.6559	246.823	0.853249
oar3_OAR3_118026534	-7.96737	204.836	0.968973
oar3_OAR3_119139728	-567.994	368.338	0.123062
oar3_OAR3_119371441	-62.2598	268.863	0.816874
oar3_OAR3_121234317	-220.15	152.718	0.149431
oar3_OAR3_122947103	260.938	176.752	0.139866
oar3_OAR3_123271498	176.924	89.8513	0.0489442
oar3_OAR3_123437696	-119.988	177.039	0.497932
oar3_OAR3_124089044	50.1583	116.545	0.666923
oar3_OAR3_125042123	61.6066	113.061	0.585825
oar3_OAR3_125050915	-326.228	251.571	0.194714
oar3_OAR3_125066121	-16.9469	103.895	0.870427
OAR3_133705445.1	-146.362	115.692	0.205834
oar3_OAR3_125380716	-80.9623	262.374	0.757644
oar3_OAR3_125604866	251.42	284.178	0.376304
oar3_OAR3_125768063	125.814	110.857	0.256409
oar3_OAR3_125912008	-19.6696	141.535	0.889471
oar3_OAR3_126109052	-114.763	117.756	0.329766
oar3_OAR3_127339732	212.393	124.854	0.0889181
oar3_OAR3_128054735	277.084	NA	NA
oar3_OAR3_129028791	-583.215	265.314	0.0279343
oar3_OAR3_129028814	-583.215	265.314	0.0279343
oar3_OAR3_129400693	303.982	121.798	0.0125678
oar3_OAR3_129493091	143.436	121.436	0.237536
oar3_OAR3_129760144	28.9245	142.532	0.839187
oar3_OAR3_129931978	-603.785	260.808	0.0206101
oar3_OAR3_130329803	475.504	378.345	0.208825
oar3_OAR3_130347500	475.504	378.345	0.208825
oar3_OAR3_130796915	33.5278	87.6506	0.702078
oar3_OAR3_131950383	46.674	83.9794	0.578362
oar3_OAR3_132676924	48.447	77.3615	0.531156
oar3_OAR3_133148483	-62.9608	106.191	0.553248
oar3_OAR3_133423555	-93.2932	175.899	0.595848
oar3_OAR3_133531057	62.11	108.446	0.56683
oar3_OAR3_134116136	424.666	332.546	0.201597
oar3_OAR3_134140997	677.761	192.022	0.000416175
oar3_OAR3_135045144	277.084	NA	NA
oar3_OAR3_137569238	83.5431	158.895	0.599045
oar3_OAR3_138062914	-198.094	155.665	0.20317
oar3_OAR3_138067919	-288.084	164.066	0.0791042
oar3_OAR3_138242146	-238.674	139.281	0.0865986
oar3_OAR3_138611114	390.637	263.913	0.138826
oar3_OAR3_139386771	-33.7942	77.2459	0.661757
oar3_OAR3_140439509	21.1727	153.653	0.890402
oar3_OAR3_140441077	21.1727	153.653	0.890402
oar3_OAR3_141592345	83.6767	77.1642	0.278189
oar3_OAR3_141765796	31.4191	221.192	0.887045
oar3_OAR3_141819356	541.981	334.275	0.10494
oar3_OAR3_141867402	128.79	168.622	0.444998
oar3_OAR3_142222007	-29.6366	82.6209	0.719816
oar3_OAR3_143365066	-100.649	81.8793	0.218982
oar3_OAR3_143770799	-58.5764	87.4773	0.503101
oar3_OAR3_144253760	-128.572	169.079	0.447
oar3_OAR3_144740595	-17.0641	311.575	0.956324
oar3_OAR3_144925930	-41.2619	85.4729	0.629274
oar3_OAR3_145369109	-105.611	213.652	0.621084
oar3_OAR3_145447468	307.116	171.124	0.0727022
oar3_OAR3_145780331	84.4991	118.597	0.476163
oar3_OAR3_147196668	-22.8657	87.5927	0.794057
OAR3_157131271.1	338.557	192.218	0.0781839
oar3_OAR3_147419898	-90.5491	100.742	0.368747
OAR3_158584850_X.1	-48.2294	80.408	0.548634
oar3_OAR3_148778201	331.885	236.312	0.160189
oar3_OAR3_149545678	261.242	133.775	0.0508377
oar3_OAR3_150362307	-152.153	157.751	0.334791
oar3_OAR3_150791543	-41.4845	85.3679	0.627003
oar3_OAR3_151135480	185.09	159.835	0.246861
oar3_OAR3_151857528	-100.943	136.242	0.458752
oar3_OAR3_152808974	-158.483	168.173	0.346
oar3_OAR3_153036181	32.9103	119.054	0.782217
oar3_OAR3_153113583	103.724	106.981	0.332271
oar3_OAR3_153207098	71.8376	84.2601	0.393898
oar3_OAR3_153427375	-63.4142	194.318	0.744165
oar3_OAR3_153447530	-21.7378	78.8856	0.782885
oar3_OAR3_154754392	-74.5556	82.8884	0.368402
oar3_OAR3_155309701	-171.32	146.166	0.24116
oar3_OAR3_156102735	2.96214	82.6397	0.971407
oar3_OAR3_156108058	2.96214	82.6397	0.971407
oar3_OAR3_156165651	69.4952	82.0836	0.397196
oar3_OAR3_156241061	120.748	81.8411	0.140107
oar3_OAR3_156293717	-180.426	85.7353	0.035339
OAR3_167379108.1	361.848	202.989	0.0746523
oar3_OAR3_156711674	-123.407	320.917	0.700576
oar3_OAR3_156954987	88.7273	115.442	0.442138
oar3_OAR3_157398976	0.354001	129.029	0.997811
oar3_OAR3_157685407	15.84	137.554	0.908323
oar3_OAR3_157701919	-102.947	122.174	0.399436
oar3_OAR3_157710267	-341.087	372.533	0.359883
OAR3_169232013.1	31.4097	103.937	0.7625
oar3_OAR3_158194482	-130.897	90.7962	0.1494
oar3_OAR3_158778698	22.8799	78.081	0.7695
oar3_OAR3_158781593	87.8816	90.4139	0.331054
oar3_OAR3_158914450	-34.9154	132.902	0.792769
oar3_OAR3_158954044	-127.583	91.3664	0.162597
oar3_OAR3_158992664	-5.66595	129.114	0.964997
oar3_OAR3_158992891	-5.66595	129.114	0.964997
oar3_OAR3_159047471	26.164	84.8233	0.757738
oar3_OAR3_159133104	17.5686	78.9169	0.82383
oar3_OAR3_159134864	17.5686	78.9169	0.82383
oar3_OAR3_159142490	17.5686	78.9169	0.82383
oar3_OAR3_159250184	-75.765	77.7493	0.329819
oar3_OAR3_159304905	-31.233	102.244	0.760004
s05066.1	15.2279	80.1832	0.849376
oar3_OAR3_160173006	64.15	102.004	0.529417
oar3_OAR3_160256115	323.883	372.628	0.384746
oar3_OAR3_160353845	23.3947	83.5075	0.779362
oar3_OAR3_160357129	23.3947	83.5075	0.779362
oar3_OAR3_161738418	158.393	307.242	0.606182
oar3_OAR3_162287204	79.4529	100.724	0.430217
oar3_OAR3_162926643	-0.321211	97.3542	0.997367
oar3_OAR3_163584458	168.35	302.848	0.578285
oar3_OAR3_163698428	-133.25	96.2859	0.166389
oar3_OAR3_163751022	177.525	92.2256	0.0542412
oar3_OAR3_163759250	129.226	94.2839	0.170497
oar3_OAR3_163771950	129.226	94.2839	0.170497
oar3_OAR3_163793071	-45.3657	102.839	0.659115
oar3_OAR3_163975215	-177.636	116.667	0.127861
oar3_OAR3_163984333	-65.2768	109.109	0.549661
oar3_OAR3_166385221	283.227	251.114	0.259369
oar3_OAR3_167669735	-97.1109	87.2968	0.265957
oar3_OAR3_167745621	-5.88327	86.1455	0.945551
oar3_OAR3_167887079	443.583	371.025	0.231868
oar3_OAR3_167922272	-89.8532	81.4661	0.270048
oar3_OAR3_168336559	469.394	285.792	0.1005
oar3_OAR3_168547880	32.2092	239.944	0.893216
oar3_OAR3_168949883	405.747	184.667	0.0280073
oar3_OAR3_168964671	-100.914	186.723	0.588889
oar3_OAR3_169326302	-561.834	235.158	0.0168861
oar3_OAR3_169330116	277.084	NA	NA
oar3_OAR3_169368266	175.616	143.828	0.222083
oar3_OAR3_169554445	-69.4698	152.309	0.648311
oar3_OAR3_170763389	-104.245	180.832	0.564295
oar3_OAR3_171030233	-153.359	94.2452	0.103687
oar3_OAR3_171396901	211.935	97.5012	0.0297306
oar3_OAR3_171780231	-116.075	157.788	0.46195
oar3_OAR3_172423594	325.554	217.175	0.133864
oar3_OAR3_172671102	66.6901	149.184	0.654852
oar3_OAR3_172719311	21.7546	83.1264	0.793549
oar3_OAR3_173511014	23.2231	90.2939	0.797029
oar3_OAR3_175571837	-17.8844	84.3145	0.832017
oar3_OAR3_176471927	-250.804	117.576	0.0329151
oar3_OAR3_177397279	343.839	182.924	0.0601513
oar3_OAR3_177552116	87.6983	157.018	0.576488
oar3_OAR3_179124928	88.6123	82.7322	0.284136
oar3_OAR3_179324574	-193.91	145.987	0.184088
oar3_OAR3_179567213	611.004	206.912	0.00314746
s59176.1	34.6219	93.6391	0.711578
oar3_OAR3_180192397	79.5952	81.261	0.327332
oar3_OAR3_180614040	-97.3946	93.9805	0.300049
oar3_OAR3_180948069	-53.6846	104.491	0.607411
oar3_OAR3_182041009	142.791	81.2663	0.0789058
oar3_OAR3_182291263	-49.2034	78.6008	0.531321
oar3_OAR3_182385686	146.33	104.701	0.162233
oar3_OAR3_182477973	237.263	213.863	0.267252
oar3_OAR3_182497873	203.518	131.379	0.12136
oar3_OAR3_182644495	45.7343	82.5349	0.579496
oar3_OAR3_182688775	-44.037	312.136	0.887805
oar3_OAR3_183348176	-26.6302	379.121	0.944001
oar3_OAR3_184540138	2.03563	79.9225	0.97968
oar3_OAR3_184542623	2.03563	79.9225	0.97968
oar3_OAR3_185224379	-387.007	339.899	0.254873
oar3_OAR3_185666225	1.5414	128.287	0.990413
oar3_OAR3_186320598	-43.8635	128.067	0.73197
oar3_OAR3_186470605	-59.8446	90.7671	0.50969
oar3_OAR3_186900389	25.0788	83.5782	0.764128
oar3_OAR3_187697682	-309.011	307.999	0.315722
oar3_OAR3_187955433	-144.05	90.6409	0.112007
oar3_OAR3_188720370	101.406	77.7691	0.192255
oar3_OAR3_188946201	-93.4465	76.469	0.221701
oar3_OAR3_188997172	59.3661	85.8234	0.489111
oar3_OAR3_191292423	-121.569	109.318	0.266112
oar3_OAR3_191493291	114.28	232.615	0.623227
oar3_OAR3_191505727	133.36	95.075	0.160712
oar3_OAR3_191921813	26.3211	84.2867	0.754827
oar3_OAR3_191946391	431.388	249.833	0.0842203
oar3_OAR3_192053274	-13.499	101.51	0.894208
oar3_OAR3_192898466	31.8971	104.929	0.761137
OAR3_207635006.1	39.465	104.613	0.705989
oar3_OAR3_192939996	43.6225	104.629	0.676733
oar3_OAR3_193093057	-84.8788	78.1546	0.277463
oar3_OAR3_193647447	-68.0503	158.666	0.668004
oar3_OAR3_193947379	26.8095	114.727	0.815233
oar3_OAR3_194193741	52.1596	122.791	0.670995
oar3_OAR3_194432337	123.037	171.485	0.473079
oar3_OAR3_195033017	-68.4764	86.2364	0.427164
oar3_OAR3_195457861	48.1258	95.3281	0.613669
oar3_OAR3_196466099	127.612	93.9108	0.174191
oar3_OAR3_196677230	22.0269	89.6738	0.805966
s45975.1	96.6329	83.7318	0.248469
oar3_OAR3_198525250	194.959	94.3267	0.0387481
oar3_OAR3_198786829	-37.4471	77.5484	0.629176
oar3_OAR3_200614776	202.836	396.459	0.608917
oar3_OAR3_201208011	-683.678	288.063	0.0176268
OAR3_216455288.1	-53.8535	91.4555	0.555963
oar3_OAR3_201216712	-53.8535	91.4555	0.555963
oar3_OAR3_203001473	-17.707	84.1365	0.833313
oar3_OAR3_204075162	-16.8309	82.9891	0.839285
oar3_OAR3_204076493	-7.78945	82.6915	0.924951
oar3_OAR3_204076872	-8.82467	82.709	0.915031
oar3_OAR3_204242125	-175.228	80.4142	0.0293264
oar3_OAR3_204268453	158.362	84.8612	0.0620236
oar3_OAR3_204423410	131.796	87.9923	0.134181
oar3_OAR3_204786766	-47.9977	87.9304	0.585162
oar3_OAR3_204987309	637.602	330.894	0.0539915
oar3_OAR3_205103704	-28.4096	384.242	0.941061
oar3_OAR3_205195362	61.2467	168.82	0.71676
oar3_OAR3_205208784	154.638	114.514	0.176894
oar3_OAR3_205411637	-249.561	177.789	0.160411
oar3_OAR3_206004212	4.11046	150.151	0.97816
oar3_OAR3_206133894	-160.258	252.401	0.525471
oar3_OAR3_206779774	58.8156	83.0174	0.478652
oar3_OAR3_206816341	45.105	110.998	0.684479
oar3_OAR3_206816395	45.105	110.998	0.684479
oar3_OAR3_206818910	45.105	110.998	0.684479
oar3_OAR3_206833372	115.152	87.5735	0.188538
oar3_OAR3_206837739	115.152	87.5735	0.188538
oar3_OAR3_207107150	21.9603	78.5111	0.7797
oar3_OAR3_207150299	-54.7034	98.8504	0.579992
oar3_OAR3_208315406	189.789	384.501	0.62159
oar3_OAR3_208326077	-130.995	114.773	0.253729
s27475.1	-129.541	106.912	0.225641
oar3_OAR3_208576897	-71.4084	102.872	0.48759
oar3_OAR3_208590208	-23.4174	104.834	0.823242
oar3_OAR3_208655164	-61.7726	103.613	0.551052
oar3_OAR3_209117199	-137.946	205.93	0.502943
oar3_OAR3_209594716	-195.091	224.974	0.38585
oar3_OAR3_209875669	22.4435	116.954	0.84782
oar3_OAR3_210199350	271.309	120.582	0.0244492
oar3_OAR3_210472818	-130.268	195.683	0.505597
s10452.1	21.8747	81.5957	0.788633
oar3_OAR3_210767462	-76.8261	105.752	0.467548
oar3_OAR3_213103884	-1.76689	125.066	0.988728
oar3_OAR3_213175422	277.084	NA	NA
oar3_OAR3_213416762	338.576	290.827	0.24435
oar3_OAR3_214147206	-832.823	331.819	0.0120777
oar3_OAR3_214743345	224.678	340.304	0.509108
oar3_OAR3_215258904	-97.2325	144.375	0.500646
oar3_OAR3_216047899	584.477	245.905	0.0174615
oar3_OAR3_216124778	239.178	267.721	0.371651
oar3_OAR3_217123026	30.3239	78.1827	0.69812
oar3_OAR3_218516747	-22.9043	96.4285	0.812248
s18720.1	17.9481	83.2596	0.829324
oar3_OAR3_219056816	-23.573	255.066	0.926365
s33493.1	-32.4831	83.5971	0.697596
oar3_OAR3_219766232	-33.7157	77.5657	0.6638
oar3_OAR3_219909809	-202.553	83.0098	0.014683
oar3_OAR3_220742859	277.084	NA	NA
oar3_OAR3_220857739	177.105	114.087	0.120572
oar3_OAR3_221352821	104.065	162.178	0.521084
oar3_OAR3_222002867	-93.0946	110.261	0.398494
oar3_OAR3_222371809	57.4795	87.7186	0.512293
oar3_OAR3_222525469	-51.4968	81.1171	0.525529
oar3_OAR3_222958420	115.947	106.05	0.274252
oar3_OAR3_223021548	105.902	133.516	0.427673
oar3_OAR3_223118540	33.6048	83.0691	0.685815
oar3_OAR3_223158003	27.0815	341.912	0.936869
oar3_OAR3_223376099	81.2097	80.3466	0.31214
oar3_OAR3_223387950	-16.0711	126.218	0.898681
oar3_OAR3_223531986	-26.609	94.1864	0.777549
oar3_OAR3_223778934	-70.3704	115.645	0.542854
oar3_OAR4_922397	76.2406	95.5184	0.424767
oar3_OAR4_1127851	-22.7834	88.5106	0.796864
oar3_OAR4_2183963	-16.4329	222.804	0.941205
s45129.1	-91.1713	197.667	0.644629
oar3_OAR4_4106583	-24.2324	212.996	0.909421
oar3_OAR4_4226360	11.4492	127.706	0.928563
oar3_OAR4_4645033	123.406	81.9082	0.131904
oar3_OAR4_4865241	84.0714	110.423	0.446442
oar3_OAR4_5292765	5.76355	78.6476	0.941581
oar3_OAR4_5525622	34.7771	188.017	0.853255
oar3_OAR4_5911886	-104.693	100.603	0.298037
OARUn.284_34504.1	-89.6859	154.489	0.561554
oar3_OAR4_6355732	-66.7506	98.374	0.49743
oar3_OAR4_6721305	184.896	84.4403	0.0285485
oar3_OAR4_6843996	-39.3915	159.774	0.80526
oar3_OAR4_6960340	221.734	191.573	0.247093
oar3_OAR4_6977599	239.384	280.906	0.394111
oar3_OAR4_7451060	-6.42147	82.6235	0.938051
oar3_OAR4_7454267	-6.42147	82.6235	0.938051
oar3_OAR4_7524786	7.92052	76.8834	0.917947
oar3_OAR4_7925619	143.355	191.411	0.453896
oar3_OAR4_8310075	-0.0389236	83.8117	0.999629
oar3_OAR4_9104860	-212.701	264.212	0.420796
oar3_OAR4_9324811	453.078	342.295	0.18562
oar3_OAR4_9455152	36.3378	97.3646	0.708989
oar3_OAR4_10259283	-60.9676	170.586	0.720792
oar3_OAR4_11228780	-45.5262	97.4086	0.640233
oar3_OAR4_13999657	-31.4669	89.8923	0.7263
oar3_OAR4_14062858	278.165	227.107	0.220644
oar3_OAR4_14953947	140.991	139.981	0.313832
oar3_OAR4_15446928	-39.6113	205.276	0.846986
oar3_OAR4_16877016	362.333	266.265	0.173578
oar3_OAR4_17032504	625.633	268.435	0.0197711
oar3_OAR4_17325363	-127.55	74.2815	0.0859587
oar3_OAR4_17953471	-29.5673	84.4653	0.726299
oar3_OAR4_18088257	1.7927	106.988	0.986631
oar3_OAR4_19011657	-18.7378	88.2497	0.831852
oar3_OAR4_19075257	-28.9863	120.864	0.810465
oar3_OAR4_20293532	619.216	305.337	0.0425628
oar3_OAR4_20293918	619.216	305.337	0.0425628
oar3_OAR4_20668833	-97.1076	94.3267	0.303253
oar3_OAR4_21340197	10.9676	76.7777	0.88641
oar3_OAR4_21716707	111.08	229.852	0.628907
oar3_OAR4_22159223	-10.0626	89.7054	0.910686
OAR4_23831198.1	96.0519	104.301	0.357096
OAR4_24289280.1	127.123	140.248	0.364713
oar3_OAR4_23193048	149.915	138.495	0.279047
oar3_OAR4_23276583	29.8048	214.45	0.889464
oar3_OAR4_23465899	324.481	299.906	0.279279
s75160.1	-151.088	129.138	0.242009
oar3_OAR4_23934801	-243.616	118.403	0.0396371
oar3_OAR4_23939441	-178.005	88.063	0.0432455
oar3_OAR4_24453875	-54.9821	108.064	0.610899
OAR4_25854150.1	-99.6823	165.577	0.547155
oar3_OAR4_24833118	-59.8574	94.4981	0.526456
oar3_OAR4_25917293	24.0395	77.2862	0.755767
oar3_OAR4_26108755	-134.942	113.22	0.233318
oar3_OAR4_26795944	277.084	NA	NA
oar3_OAR4_27421023	-48.5318	90.1225	0.590226
oar3_OAR4_28389469	-99.5141	151.638	0.511657
oar3_OAR4_29655372	-165.501	80.7065	0.0403003
oar3_OAR4_30446719	-60.4793	80.0951	0.450193
oar3_OAR4_30890988	-68.2265	225.236	0.761958
oar3_OAR4_31046407	-85.6364	136.611	0.530749
oar3_OAR4_31348940	1.02665	289.238	0.997168
oar3_OAR4_31522557	-52.8056	115.076	0.646324
oar3_OAR4_32294264	-177.131	213.822	0.407442
oar3_OAR4_32294523	-19.671	124.268	0.874224
oar3_OAR4_32730884	102.727	257.045	0.689419
oar3_OAR4_33093987	-149.786	118.632	0.206727
oar3_OAR4_33108953	156.447	87.405	0.0734679
oar3_OAR4_33309476	-4.26096	266.23	0.987231
oar3_OAR4_33446157	-53.9377	147.058	0.713785
oar3_OAR4_33452682	182.757	116.378	0.116328
oar3_OAR4_33820629	-49.2348	77.4505	0.524976
oar3_OAR4_34438542	131.386	74.6612	0.0784488
oar3_OAR4_34668129	3.41561	80.7062	0.966242
OAR4_36612315.1	101.143	89.6188	0.259072
oar3_OAR4_34677167	101.143	89.6188	0.259072
oar3_OAR4_34977500	189.313	229.37	0.409166
oar3_OAR4_35605677	30.7295	79.0333	0.697412
oar3_OAR4_35676778	-226.443	218.818	0.300742
oar3_OAR4_36211066	104.619	111.071	0.346235
oar3_OAR4_36429554	80.5989	80.4182	0.316224
oar3_OAR4_36913785	-79.0268	131.494	0.547846
oar3_OAR4_37016870	239.332	155.518	0.12382
oar3_OAR4_37207130	27.2109	176.122	0.877215
oar3_OAR4_37963202	121.444	72.7269	0.0949466
oar3_OAR4_38266537	212.957	128.234	0.0967757
oar3_OAR4_38291546	-104.779	80.3772	0.192374
oar3_OAR4_39848737	25.6119	100.025	0.797908
OAR4_42250526.1	-73.9285	95.1065	0.436968
OAR4_42323830.1	-42.9672	98.5943	0.662983
oar3_OAR4_40412067	-115.282	123.72	0.351444
oar3_OAR4_40868345	437.233	238.607	0.0668866
oar3_OAR4_40945677	634.253	229.658	0.00574965
oar3_OAR4_41082510	-228.981	191.732	0.23237
oar3_OAR4_41464652	2.05487	153.843	0.989343
oar3_OAR4_41559774	-203.175	176.795	0.250467
oar3_OAR4_41560294	-203.175	176.795	0.250467
oar3_OAR4_41611627	-162.679	117.617	0.166627
oar3_OAR4_41615794	-162.679	117.617	0.166627
oar3_OAR4_42816164	3.57568	123.758	0.97695
oar3_OAR4_42995267	40.6751	397.912	0.918581
oar3_OAR4_43504005	-40.3228	81.6526	0.621424
oar3_OAR4_43507261	-40.3228	81.6526	0.621424
oar3_OAR4_45189348	178.611	135.533	0.187557
oar3_OAR4_45195295	374.25	282.071	0.184577
s43001.1	132.086	109.882	0.229334
oar3_OAR4_47092781	132.086	109.882	0.229334
oar3_OAR4_47238945	97.6596	115.282	0.396919
oar3_OAR4_47239123	97.6596	115.282	0.396919
oar3_OAR4_47539336	110.714	99.14	0.264103
oar3_OAR4_47574226	-21.5562	338.664	0.949248
oar3_OAR4_49090495	2.98912	78.1087	0.969473
oar3_OAR4_49120554	24.0667	125.293	0.847677
oar3_OAR4_49181571	195.748	369.06	0.595837
oar3_OAR4_49299226	-92.3914	83.5146	0.268601
oar3_OAR4_49600870	122.008	89.7007	0.173775
oar3_OAR4_49623938	99.2124	378.444	0.793199
OAR4_52992211_X.1	415.532	163.096	0.0108412
oar3_OAR4_50724080	10.3123	137.561	0.940243
oar3_OAR4_50854098	107.771	116.614	0.355397
oar3_OAR4_51155443	-339.072	285.288	0.234626
oar3_OAR4_51786064	58.2441	117.044	0.618747
oar3_OAR4_52428481	6.42364	168.605	0.969609
OAR4_56655631.1	-28.5371	109.389	0.794188
OAR4_56790287.1	-422.022	263.145	0.108766
oar3_OAR4_53748246	-139.505	179.571	0.437231
oar3_OAR4_54857462	370.351	261.932	0.157385
oar3_OAR4_54868854	370.351	261.932	0.157385
oar3_OAR4_55033981	-213.587	130.897	0.102739
oar3_OAR4_55969216	165.532	97.11	0.0882724
oar3_OAR4_56393696	114.74	333.195	0.730574
oar3_OAR4_56526253	-112.181	100.39	0.263801
oar3_OAR4_56724434	110.04	167.919	0.512264
oar3_OAR4_56736368	-86.7966	257.171	0.735736
oar3_OAR4_56909402	8.97253	158.109	0.954745
OAR4_60595625.1	-317.594	319.702	0.320513
oar3_OAR4_59096857	656.354	228.176	0.00402074
oar3_OAR4_59129061	86.5375	112.933	0.443513
oar3_OAR4_59401124	570.866	371.087	0.12396
oar3_OAR4_59520310	19.7945	222.008	0.928954
OAR4_63616075.1	67.0947	92.5815	0.46863
oar3_OAR4_61007559	-11.0937	92.915	0.904962
oar3_OAR4_61020618	-359.166	196.772	0.0679568
oar3_OAR4_61029203	-230.177	339.136	0.497317
oar3_OAR4_61121883	-259.207	151.632	0.0873675
oar3_OAR4_62157118	36.0836	79.0342	0.64799
oar3_OAR4_62605655	318.167	196.158	0.104804
oar3_OAR4_63286056	-123.802	78.7748	0.116045
oar3_OAR4_63734723	277.084	NA	NA
oar3_OAR4_63735280	207.087	115.084	0.0719494
oar3_OAR4_64661960	134.456	152.147	0.376847
oar3_OAR4_64728931	40.6075	95.8015	0.671659
oar3_OAR4_64730664	-111.051	79.127	0.160481
oar3_OAR4_64760127	38.0374	240.713	0.874441
oar3_OAR4_64786265	277.084	NA	NA
oar3_OAR4_65120630	-27.7923	83.907	0.740473
oar3_OAR4_65458611	-96.9575	112.888	0.390405
oar3_OAR4_66509941	131.287	98.2049	0.181267
[truncated: 4,615 more rows]
